# Supplementary material for: SNPs in Mammary Gland Epithelial Cells Unraveling Potential Difference in Milk Production Between Jersey and Kashmiri Cattle Using RNA Sequencing
Source: Front Genet. 2021 Aug 3;12:666015. doi: 10.3389/fgene.2021.666015 (PMC8369411; doi:10.3389/fgene.2021.666015)
Supplement: Supplementary file 6 [file Table_4.xlsx]

## Sheet: SNPs
Chr	Position	Ref_All	Mutated	Mutation_type	Impact	Gene Symbol	GeneID	ID	Type	Variation	Var
1	143263600	A	C	splice_donor_variant&intron_variant	HIGH	U2AF1	ENSBTAG00000011645	ENSBTAT00000015465.4	protein_coding	c.482+2T>G
1	58190466	A	C	stop_gained	HIGH	SPICE1	ENSBTAG00000013937	ENSBTAT00000057527.3	protein_coding	c.27T>G	p.Tyr9*
1	137141357	T	A	stop_gained	HIGH	DNAJC13	ENSBTAG00000002966	ENSBTAT00000003865.6	protein_coding	c.1702A>T	p.Lys568*
1	87735714	G	A	stop_gained	HIGH	MFN1	ENSBTAG00000010485	ENSBTAT00000013860.6	protein_coding	c.1933C>T	p.Gln645*
1	126540980	G	A	splice_donor_variant&intron_variant	HIGH	ATR	ENSBTAG00000011529	ENSBTAT00000071223.1	protein_coding	c.4393+1G>A
1	136858914	C	A	stop_gained	HIGH	NPHP3	ENSBTAG00000005769	ENSBTAT00000007584.5	protein_coding	c.2505C>A	p.Tyr835*
1	149386807	C	T	stop_gained	HIGH	TTC3	ENSBTAG00000008167	ENSBTAT00000050511.3	protein_coding	c.2398C>T	p.Gln800*
1	122019135	C	T	stop_gained	HIGH	ENSBTAG00000054268	ENSBTAG00000054268	ENSBTAT00000066431.1	protein_coding	c.121C>T	p.Arg41*
1	80465472	A	C	splice_acceptor_variant&intron_variant	HIGH	RFC4	ENSBTAG00000014727	ENSBTAT00000071469.1	protein_coding	c.555-2A>C
1	134963333	G	T	stop_gained	HIGH	AMOTL2	ENSBTAG00000000742	ENSBTAT00000000988.6	protein_coding	c.2191G>T	p.Glu731*
1	38315869	T	A	stop_gained	HIGH	STX19	ENSBTAG00000005162	ENSBTAT00000006804.4	protein_coding	c.817A>T	p.Lys273*
1	125356210	A	T	splice_donor_variant&intron_variant	HIGH	SLC9A9	ENSBTAG00000031178	ENSBTAT00000044136.4	protein_coding	c.894+1A>T
1	7142766	A	G	splice_donor_variant&intron_variant	HIGH	USP16	ENSBTAG00000020122	ENSBTAT00000026801.5	protein_coding	c.860+2T>C
1	57721620	G	T	stop_gained	HIGH	GTPBP8	ENSBTAG00000006534	ENSBTAT00000032325.5	protein_coding	c.802G>T	p.Gly268*
1	50109833	G	T	stop_gained	HIGH	ALCAM	ENSBTAG00000000088	ENSBTAT00000000097.5	protein_coding	c.835G>T	p.Glu279*
1	106966998	A	T	stop_gained	HIGH	KPNA4	ENSBTAG00000017416	ENSBTAT00000023150.6	protein_coding	c.895A>T	p.Lys299*
1	80465473	G	T	splice_acceptor_variant&intron_variant	HIGH	RFC4	ENSBTAG00000014727	ENSBTAT00000071469.1	protein_coding	c.555-1G>T
1	38360650	T	C	start_lost	HIGH	NSUN3	ENSBTAG00000015728	ENSBTAT00000020876.5	protein_coding	c.2T>C	p.Met1?
2	14412387	G	T	stop_gained&splice_region_variant	HIGH	ENSBTAG00000050322	ENSBTAG00000050322	ENSBTAT00000066374.1	protein_coding	c.1292C>A	p.Ser431*
2	132645789	G	A	stop_gained	HIGH	PLA2G5	ENSBTAG00000039122	ENSBTAT00000077544.1	protein_coding	c.382C>T	p.Arg128*
2	36572140	T	C	splice_donor_variant&intron_variant	HIGH	CD302	ENSBTAG00000038195	ENSBTAT00000056635.2	protein_coding	c.295+2T>C
2	119417214	T	A	splice_donor_variant&intron_variant	HIGH	PTMA	ENSBTAG00000002549	ENSBTAT00000003305.5	protein_coding	c.117+2T>A
2	119417213	G	A	splice_donor_variant&intron_variant	HIGH	PTMA	ENSBTAG00000002549	ENSBTAT00000003305.5	protein_coding	c.117+1G>A
2	22323533	G	A	splice_donor_variant&intron_variant	HIGH	GPR155	ENSBTAG00000021636	ENSBTAT00000078829.1	protein_coding	c.-32+1G>A
2	136034088	G	T	stop_gained	HIGH	FAM131C	ENSBTAG00000034680	ENSBTAT00000049120.4	protein_coding	c.391G>T	p.Glu131*
2	121573135	T	C	splice_acceptor_variant&intron_variant	HIGH	ENSBTAG00000051364	ENSBTAG00000051364	ENSBTAT00000081135.1	protein_coding	c.35-2A>G
2	47453386	T	A	stop_gained	HIGH	EPC2	ENSBTAG00000018581	ENSBTAT00000024730.6	protein_coding	c.640A>T	p.Arg214*
2	89474064	G	C	splice_donor_variant&intron_variant	HIGH	BZW1	ENSBTAG00000006049	ENSBTAT00000007948.6	protein_coding	c.241+1G>C
2	89474065	T	C	splice_donor_variant&intron_variant	HIGH	BZW1	ENSBTAG00000006049	ENSBTAT00000007948.6	protein_coding	c.241+2T>C
2	27961213	A	T	stop_gained	HIGH	STK39	ENSBTAG00000017162	ENSBTAT00000074419.1	protein_coding	c.430A>T	p.Lys144*
2	73114404	T	A	stop_gained	HIGH	CLASP1	ENSBTAG00000019781	ENSBTAT00000065657.2	protein_coding	c.3223A>T	p.Lys1075*
2	96222640	C	A	stop_gained	HIGH	PLEKHM3	ENSBTAG00000007830	ENSBTAT00000010299.5	protein_coding	c.1705G>T	p.Glu569*
2	106265165	T	C	splice_donor_variant&intron_variant	HIGH	ARPC2	ENSBTAG00000010386	ENSBTAT00000013707.3	protein_coding	c.109+2T>C
2	106595933	C	T	stop_gained	HIGH	PLCD4	ENSBTAG00000003809	ENSBTAT00000044026.3	protein_coding	c.1708C>T	p.Gln570*
2	1240405	C	G	splice_acceptor_variant&intron_variant	HIGH	TUBGCP5	ENSBTAG00000014714	ENSBTAT00000019582.6	protein_coding	c.2413-1G>C
3	80632738	G	A	stop_gained	HIGH	RAVER2	ENSBTAG00000030686	ENSBTAT00000085095.1	protein_coding	c.1792C>T	p.Gln598*
3	13946325	G	T	stop_gained	HIGH	PEAR1	ENSBTAG00000012405	ENSBTAT00000033952.4	protein_coding	c.852C>A	p.Cys284*
3	21677406	A	C	stop_gained	HIGH	ENSBTAG00000053114	ENSBTAG00000053114	ENSBTAT00000071876.1	protein_coding	c.443T>G	p.Leu148*
3	87386560	T	A	stop_gained	HIGH	MYSM1	ENSBTAG00000013961	ENSBTAT00000080652.1	protein_coding	c.2466T>A	p.Cys822*
3	15428643	C	A	splice_donor_variant&intron_variant	HIGH	MUC1	ENSBTAG00000017104	ENSBTAT00000014051.6	protein_coding	c.235+2C>A
3	15382811	G	T	start_lost	HIGH	FAM189B	ENSBTAG00000047731	ENSBTAT00000066098.2	protein_coding	c.3G>T	p.Met1?
3	26903104	A	G	splice_donor_variant&intron_variant	HIGH	ATP1A1	ENSBTAG00000001246	ENSBTAT00000068959.1	protein_coding	c.723+2T>C
3	109965793	T	C	splice_acceptor_variant&intron_variant	HIGH	AGO4	ENSBTAG00000015220	ENSBTAT00000020250.6	protein_coding	c.497-2A>G
3	100731821	T	C	stop_lost	HIGH	HPDL	ENSBTAG00000011241	ENSBTAT00000014927.4	protein_coding	c.1172A>G	p.Ter391Trpext*?
3	14805352	T	C	splice_donor_variant&intron_variant	HIGH	ARHGEF2	ENSBTAG00000000113	ENSBTAT00000071999.1	protein_coding	c.1710+2T>C
3	113053049	C	T	splice_donor_variant&intron_variant	HIGH	ENSBTAG00000054491	ENSBTAG00000054491	ENSBTAT00000077886.1	protein_coding	c.244+1G>A
3	77178882	T	G	stop_lost	HIGH	WLS	ENSBTAG00000012976	ENSBTAT00000073914.1	protein_coding	c.1537T>G	p.Ter513Gluext*?
3	116782510	T	A	splice_acceptor_variant&intron_variant	HIGH	COL6A3	ENSBTAG00000030190	ENSBTAT00000018479.6	protein_coding	c.9356-2A>T
3	28617967	T	G	splice_donor_variant&intron_variant	HIGH	NRAS	ENSBTAG00000046797	ENSBTAT00000012897.6	protein_coding	c.290+2T>G
3	113048844	T	C	splice_acceptor_variant&intron_variant	HIGH	ENSBTAG00000054491	ENSBTAG00000054491	ENSBTAT00000077886.1	protein_coding	c.278-2A>G
3	23366253	T	G	splice_donor_variant&intron_variant	HIGH	NOTCH2	ENSBTAG00000007909	ENSBTAT00000085176.1	protein_coding	c.6027+2T>G
3	100555131	T	A	splice_donor_variant&intron_variant	HIGH	PRDX1	ENSBTAG00000003642	ENSBTAT00000004751.4	protein_coding	c.260+2T>A
3	34600018	T	A	stop_gained	HIGH	STXBP3	ENSBTAG00000007330	ENSBTAT00000009642.6	protein_coding	c.394A>T	p.Arg132*
3	109422302	T	C	splice_donor_variant&intron_variant	HIGH	CSF3R	ENSBTAG00000013334	ENSBTAT00000017732.5	protein_coding	c.485+2T>C
3	15258074	T	A	splice_donor_variant&intron_variant	HIGH	ASH1L	ENSBTAG00000003954	ENSBTAT00000005172.6	protein_coding	c.6542+2T>A
4	60054543	G	T	splice_donor_variant&intron_variant	HIGH	ELMO1	ENSBTAG00000003490	ENSBTAT00000082952.1	protein_coding	c.243+1G>T
4	4698404	G	T	stop_gained&splice_region_variant	HIGH	COBL	ENSBTAG00000023806	ENSBTAT00000081952.1	protein_coding	c.454G>T	p.Glu152*
4	105599361	G	T	stop_gained	HIGH	ENSBTAG00000053682	ENSBTAG00000053682	ENSBTAT00000069725.1	protein_coding	c.241G>T	p.Glu81*
4	30686190	T	G	stop_gained	HIGH	DNAH11	ENSBTAG00000013078	ENSBTAT00000061103.3	protein_coding	c.12978T>G	p.Tyr4326*
4	102933898	T	A	splice_donor_variant&intron_variant	HIGH	ENSBTAG00000017770	ENSBTAG00000017770	ENSBTAT00000023628.6	protein_coding	c.507+2T>A
4	106256249	C	A	stop_gained	HIGH	KEL	ENSBTAG00000014533	ENSBTAT00000019317.5	protein_coding	c.1366G>T	p.Glu456*
4	112340791	T	C	splice_donor_variant&intron_variant	HIGH	ZNF212	ENSBTAG00000000389	ENSBTAT00000000499.5	protein_coding	c.631+2T>C
4	107026616	C	G,A	stop_gained	HIGH	TCAF1	ENSBTAG00000002554	ENSBTAT00000057182.2	protein_coding	c.2362G>T	p.Glu788*
4	60054544	T	G	splice_donor_variant&intron_variant	HIGH	ELMO1	ENSBTAG00000003490	ENSBTAT00000082952.1	protein_coding	c.243+2T>G
4	113901223	T	A	splice_donor_variant&intron_variant	HIGH	NUB1	ENSBTAG00000004540	ENSBTAT00000005970.6	protein_coding	c.357+2T>A
4	7632393	A	C	splice_donor_variant&intron_variant	HIGH	UPP1	ENSBTAG00000008428	ENSBTAT00000011088.5	protein_coding	c.617+2T>G
4	112939844	C	A	stop_gained	HIGH	ENSBTAG00000039588	ENSBTAG00000039588	ENSBTAT00000079610.1	protein_coding	c.886G>T	p.Glu296*
4	112942419	A	G	splice_donor_variant&intron_variant	HIGH	ENSBTAG00000039588	ENSBTAG00000039588	ENSBTAT00000079610.1	protein_coding	c.166+2T>C
4	87988844	C	A	splice_acceptor_variant&intron_variant	HIGH	WASL	ENSBTAG00000004643	ENSBTAT00000074672.1	protein_coding	c.*30-1G>T
5	101685436	G	A	splice_donor_variant&intron_variant	HIGH	CLEC4D	ENSBTAG00000039347	ENSBTAT00000055016.3	protein_coding	c.28+1G>A
5	101685437	T	A	splice_donor_variant&intron_variant	HIGH	CLEC4D	ENSBTAG00000039347	ENSBTAT00000055016.3	protein_coding	c.28+2T>A
5	34299779	C	T	stop_gained	HIGH	SCAF11	ENSBTAG00000001810	ENSBTAT00000002366.5	protein_coding	c.3598C>T	p.Gln1200*
5	41892988	C	T	stop_gained	HIGH	KIF21A	ENSBTAG00000004832	ENSBTAT00000006351.6	protein_coding	c.3418C>T	p.Gln1140*
5	25896459	C	G	splice_acceptor_variant&intron_variant	HIGH	ENSBTAG00000049837	ENSBTAG00000049837	ENSBTAT00000086041.1	pseudogene	n.305-1G>C
5	103789041	C	T	stop_gained	HIGH	ACRBP	ENSBTAG00000034246	ENSBTAT00000048539.4	protein_coding	c.679C>T	p.Gln227*
5	116684098	C	A	stop_gained	HIGH	CELSR1	ENSBTAG00000008036	ENSBTAT00000010571.5	protein_coding	c.6358G>T	p.Glu2120*
5	14661668	G	A	stop_gained	HIGH	TSPAN19	ENSBTAG00000047203	ENSBTAT00000063016.2	protein_coding	c.172C>T	p.Arg58*
5	109542443	A	G	start_lost	HIGH	ENSBTAG00000048772	ENSBTAG00000048772	ENSBTAT00000070365.1	protein_coding	c.1A>G	p.Met1?
5	95177509	G	T	splice_donor_variant&intron_variant	HIGH	GUCY2C	ENSBTAG00000019722	ENSBTAT00000026286.5	protein_coding	c.330+1G>T
5	56248704	T	A	splice_acceptor_variant&intron_variant	HIGH	LRP1	ENSBTAG00000010830	ENSBTAT00000017556.6	protein_coding	c.7685-2A>T
5	31184811	G	C	splice_donor_variant&intron_variant	HIGH	LALBA	ENSBTAG00000005859	ENSBTAT00000066421.1	protein_coding	c.379+1G>C
5	31184812	T	C	splice_donor_variant&intron_variant	HIGH	LALBA	ENSBTAG00000005859	ENSBTAT00000066421.1	protein_coding	c.379+2T>C
5	29727199	C	A	stop_gained	HIGH	LIMA1	ENSBTAG00000012342	ENSBTAT00000016376.5	protein_coding	c.1622C>A	p.Ser541*
5	103496257	T	G	splice_donor_variant&intron_variant	HIGH	PHB2	ENSBTAG00000013123	ENSBTAT00000084451.1	protein_coding	c.798+2T>G
5	109175764	G	A	stop_gained	HIGH	MICAL3	ENSBTAG00000048271	ENSBTAT00000065648.2	protein_coding	c.5557C>T	p.Gln1853*
5	56209280	T	A	splice_acceptor_variant&intron_variant	HIGH	SHMT2	ENSBTAG00000031500	ENSBTAT00000038244.3	protein_coding	c.1124-2A>T
5	100491957	C	T	splice_donor_variant&intron_variant	HIGH	ENSBTAG00000046324	ENSBTAG00000046324	ENSBTAT00000085200.1	protein_coding	c.125+1G>A
5	27043941	G	A	splice_acceptor_variant&intron_variant	HIGH	KRT8	ENSBTAG00000000836	ENSBTAT00000001108.6	protein_coding	c.555-1G>A
5	44996000	C	A	stop_gained	HIGH	ENSBTAG00000051975	ENSBTAG00000051975	ENSBTAT00000083053.1	protein_coding	c.71C>A	p.Ser24*
5	41981009	A	T	stop_lost&splice_region_variant	HIGH	ENSBTAG00000048924	ENSBTAG00000048924	ENSBTAT00000086770.1	protein_coding	c.508T>A	p.Ter170Lysext*?
5	22722149	G	A	stop_gained	HIGH	EEA1	ENSBTAG00000000421	ENSBTAT00000081019.1	protein_coding	c.589C>T	p.Gln197*
5	95301997	G	A	stop_gained&splice_region_variant	HIGH	PLBD1	ENSBTAG00000015562	ENSBTAT00000083973.1	protein_coding	c.150G>A	p.Trp50*
5	47495798	A	G	splice_donor_variant&intron_variant	HIGH	HELB	ENSBTAG00000020806	ENSBTAT00000063430.2	protein_coding	c.2261+2T>C
5	114681002	C	T	stop_gained	HIGH	ENSBTAG00000045746	ENSBTAG00000045746	ENSBTAT00000066219.2	protein_coding	c.1165C>T	p.Gln389*
5	28590144	G	A	stop_gained	HIGH	POU6F1	ENSBTAG00000016362	ENSBTAT00000067030.1	protein_coding	c.957G>A	p.Trp319*
5	62746385	G	A	splice_acceptor_variant&intron_variant	HIGH	SLC25A3	ENSBTAG00000012890	ENSBTAT00000017131.6	protein_coding	c.-4-1G>A
5	30116462	A	G	splice_donor_variant&intron_variant	HIGH	TMBIM6	ENSBTAG00000018588	ENSBTAT00000046359.4	protein_coding	c.513+2T>C
5	106538541	A	G	splice_acceptor_variant&intron_variant	HIGH	TSPAN11	ENSBTAG00000020699	ENSBTAT00000067606.1	protein_coding	c.277-2A>G
5	57531269	T	G	splice_donor_variant&intron_variant	HIGH	CD63	ENSBTAG00000011931	ENSBTAT00000078460.1	protein_coding	c.426+2T>G
5	57531268	G	T	splice_donor_variant&intron_variant	HIGH	CD63	ENSBTAG00000011931	ENSBTAT00000078460.1	protein_coding	c.426+1G>T
6	58122875	T	C	splice_donor_variant&intron_variant	HIGH	FAM114A1	ENSBTAG00000033160	ENSBTAT00000086949.1	protein_coding	c.831+2T>C
6	12974531	C	A	splice_donor_variant&intron_variant	HIGH	LARP7	ENSBTAG00000009632	ENSBTAT00000084701.1	protein_coding	c.1704+1G>T
6	66989007	G	A	stop_gained&splice_region_variant	HIGH	ENSBTAG00000051457	ENSBTAG00000051457	ENSBTAT00000080125.1	protein_coding	c.553C>T	p.Gln185*
6	117651312	T	C	splice_donor_variant&intron_variant	HIGH	ATP5ME	ENSBTAG00000017496	ENSBTAT00000085274.1	protein_coding	c.511+2T>C
6	117651311	G	A	splice_donor_variant&intron_variant	HIGH	ATP5ME	ENSBTAG00000017496	ENSBTAT00000085274.1	protein_coding	c.511+1G>A
6	59715666	G	A	stop_gained	HIGH	APBB2	ENSBTAG00000027569	ENSBTAT00000039647.5	protein_coding	c.2116C>T	p.Gln706*
6	15837224	C	A	stop_gained	HIGH	SEC24B	ENSBTAG00000010945	ENSBTAT00000048781.3	protein_coding	c.2863G>T	p.Glu955*
6	91997564	T	A	splice_donor_variant&intron_variant	HIGH	CCNG2	ENSBTAG00000021768	ENSBTAT00000029017.6	protein_coding	c.527+2T>A
6	105215089	A	G	splice_donor_variant&intron_variant	HIGH	SLC2A9	ENSBTAG00000039197	ENSBTAT00000079223.1	protein_coding	c.228+2T>C
6	102042262	G	T	stop_gained	HIGH	AFF1	ENSBTAG00000018488	ENSBTAT00000070038.1	protein_coding	c.3541G>T	p.Glu1181*
7	43695289	G	T	splice_acceptor_variant&intron_variant	HIGH	MIDN	ENSBTAG00000012172	ENSBTAT00000081626.1	protein_coding	c.968-1G>T
7	47484525	G	C	splice_acceptor_variant&intron_variant	HIGH	TGFBI	ENSBTAG00000009513	ENSBTAT00000076090.1	protein_coding	c.299-1G>C
7	19335407	A	C	splice_acceptor_variant&intron_variant	HIGH	ENSBTAG00000054796	ENSBTAG00000054796	ENSBTAT00000070373.1	pseudogene	n.515-2A>C
7	60977129	G	T	stop_gained	HIGH	ARHGEF37	ENSBTAG00000015419	ENSBTAT00000020493.6	protein_coding	c.1483G>T	p.Glu495*
7	94922529	A	G	stop_lost	HIGH	ARSK	ENSBTAG00000020178	ENSBTAT00000026877.6	protein_coding	c.1623A>G	p.Ter541Trpext*?
7	109021963	C	T	stop_gained	HIGH	MAN2A1	ENSBTAG00000025029	ENSBTAT00000042616.4	protein_coding	c.3448C>T	p.Arg1150*
7	19335408	G	T	splice_acceptor_variant&intron_variant	HIGH	ENSBTAG00000054796	ENSBTAG00000054796	ENSBTAT00000070373.1	pseudogene	n.515-1G>T
7	4178279	A	G	splice_donor_variant&intron_variant	HIGH	ARMC6	ENSBTAG00000013291	ENSBTAT00000067187.1	protein_coding	c.-50+2T>C
7	59823087	A	T	splice_acceptor_variant&intron_variant	HIGH	FBXO38	ENSBTAG00000020303	ENSBTAT00000027060.6	protein_coding	c.869-2A>T
7	4058066	G	C	splice_donor_variant&intron_variant	HIGH	NR2C2AP	ENSBTAG00000001763	ENSBTAT00000073874.1	protein_coding	c.-109+1G>C
7	4341927	C	T	splice_donor_variant&intron_variant	HIGH	UPF1	ENSBTAG00000020922	ENSBTAT00000027868.6	protein_coding	c.2627+1G>A
7	11027956	A	T	stop_lost&splice_region_variant	HIGH	ENSBTAG00000014365	ENSBTAG00000014365	ENSBTAT00000057152.3	protein_coding	c.1269A>T	p.Ter423Tyrext*?
7	43541536	G	A	splice_donor_variant&intron_variant	HIGH	CNN2	ENSBTAG00000020764	ENSBTAT00000027670.5	protein_coding	c.507+1G>A
7	59823088	G	A	splice_acceptor_variant&intron_variant	HIGH	FBXO38	ENSBTAG00000020303	ENSBTAT00000027060.6	protein_coding	c.869-1G>A
7	21450068	C	A	splice_acceptor_variant&intron_variant	HIGH	IZUMO4	ENSBTAG00000025448	ENSBTAT00000035773.5	protein_coding	c.471-1G>T
7	21450069	T	G	splice_acceptor_variant&intron_variant	HIGH	IZUMO4	ENSBTAG00000025448	ENSBTAT00000035773.5	protein_coding	c.471-2A>C
7	17143033	T	G	splice_acceptor_variant&intron_variant	HIGH	MYO1F	ENSBTAG00000007661	ENSBTAT00000010081.6	protein_coding	c.772-2A>C
7	17143032	C	A	splice_acceptor_variant&intron_variant	HIGH	MYO1F	ENSBTAG00000007661	ENSBTAT00000010081.6	protein_coding	c.772-1G>T
7	52672692	G	A	splice_acceptor_variant&intron_variant	HIGH	ENSBTAG00000030499	ENSBTAG00000030499	ENSBTAT00000083004.1	protein_coding	c.1135-1C>T
7	3759226	G	T	stop_gained	HIGH	PBX4	ENSBTAG00000009975	ENSBTAT00000013152.6	protein_coding	c.751G>T	p.Glu251*
7	7712170	T	G	splice_donor_variant&intron_variant	HIGH	WIZ	ENSBTAG00000010450	ENSBTAT00000087048.1	protein_coding	c.278+2T>G
7	11655817	T	A	splice_acceptor_variant&intron_variant	HIGH	IL27RA	ENSBTAG00000016933	ENSBTAT00000022524.6	protein_coding	c.686-2A>T
7	53190171	A	C	splice_acceptor_variant&intron_variant	HIGH	NDFIP1	ENSBTAG00000047747	ENSBTAT00000085973.1	protein_coding	c.464-2A>C
7	53190172	G	T	splice_acceptor_variant&intron_variant	HIGH	NDFIP1	ENSBTAG00000047747	ENSBTAT00000085973.1	protein_coding	c.464-1G>T
7	10998206	G	A	start_lost	HIGH	ENSBTAG00000014365	ENSBTAG00000014365	ENSBTAT00000082095.1	protein_coding	c.3G>A	p.Met1?
7	30995843	A	T	splice_donor_variant&intron_variant	HIGH	SNX2	ENSBTAG00000025358	ENSBTAT00000035582.4	protein_coding	c.1509+2T>A
7	19324211	A	T	splice_donor_variant&intron_variant	HIGH	ENSBTAG00000054796	ENSBTAG00000054796	ENSBTAT00000078987.1	pseudogene	n.562+2A>T
7	61708423	C	T	stop_gained&splice_region_variant	HIGH	TCOF1	ENSBTAG00000015224	ENSBTAT00000020259.5	protein_coding	c.106C>T	p.Gln36*
7	98122830	G	A	stop_gained	HIGH	CHD1	ENSBTAG00000020860	ENSBTAT00000034967.5	protein_coding	c.700C>T	p.Gln234*
7	15023600	C	A	stop_gained	HIGH	S1PR5	ENSBTAG00000003544	ENSBTAT00000004608.5	protein_coding	c.397G>T	p.Glu133*
7	11026958	C	A	stop_gained	HIGH	ENSBTAG00000014365	ENSBTAG00000014365	ENSBTAT00000082095.1	protein_coding	c.1251C>A	p.Cys417*
7	10849404	G	C,A	stop_gained&splice_region_variant	HIGH	ENSBTAG00000026148	ENSBTAG00000026148	ENSBTAT00000027132.6	protein_coding	c.916C>T	p.Gln306*
7	5065547	G	A	stop_gained	HIGH	PIK3R2	ENSBTAG00000002350	ENSBTAT00000003033.5	protein_coding	c.1339C>T	p.Gln447*
7	43695288	A	C	splice_acceptor_variant&intron_variant	HIGH	MIDN	ENSBTAG00000012172	ENSBTAT00000081626.1	protein_coding	c.968-2A>C
8	84388691	T	C	start_lost	HIGH	FGD3	ENSBTAG00000006939	ENSBTAT00000009131.5	protein_coding	c.2T>C	p.Met1?
8	44072815	A	G	splice_donor_variant&intron_variant	HIGH	DOCK8	ENSBTAG00000002190	ENSBTAT00000002840.6	protein_coding	c.4335+2T>C
8	102581386	C	A	stop_gained	HIGH	WDR31	ENSBTAG00000005884	ENSBTAT00000007735.4	protein_coding	c.313G>T	p.Glu105*
8	110588863	G	T	stop_gained	HIGH	ENSBTAG00000054630	ENSBTAG00000054630	ENSBTAT00000084995.1	protein_coding	c.368C>A	p.Ser123*
8	63168508	T	A	splice_donor_variant&intron_variant	HIGH	ANP32B	ENSBTAG00000021367	ENSBTAT00000028486.6	protein_coding	c.357+2T>A
8	111088570	G	T	stop_gained	HIGH	TRAPPC12	ENSBTAG00000008685	ENSBTAT00000082010.1	protein_coding	c.5C>A	p.Ser2*
8	63168507	G	A	splice_donor_variant&intron_variant	HIGH	ANP32B	ENSBTAG00000021367	ENSBTAT00000028486.6	protein_coding	c.357+1G>A
8	99718204	C	T	stop_gained	HIGH	PALM2	ENSBTAG00000014471	ENSBTAT00000082476.1	protein_coding	c.3883C>T	p.Arg1295*
8	110313133	C	A	stop_gained	HIGH	TRAF1	ENSBTAG00000003012	ENSBTAT00000043659.4	protein_coding	c.94G>T	p.Glu32*
8	99718168	C	T	stop_gained	HIGH	PALM2	ENSBTAG00000014471	ENSBTAT00000082476.1	protein_coding	c.3847C>T	p.Gln1283*
8	59890550	C	T	splice_donor_variant&intron_variant	HIGH	TLN1	ENSBTAG00000025868	ENSBTAT00000074863.1	protein_coding	c.1233+1G>A
8	102675851	G	A	splice_donor_variant&intron_variant	HIGH	C8H9orf43	ENSBTAG00000009596	ENSBTAT00000012629.6	protein_coding	c.1168+1G>A
8	24973459	C	G	splice_donor_variant&intron_variant	HIGH	DENND4C	ENSBTAG00000003097	ENSBTAT00000073212.1	protein_coding	c.2502+1G>C
8	37931344	A	G	splice_donor_variant&intron_variant	HIGH	KDM4C	ENSBTAG00000043987	ENSBTAT00000068602.1	protein_coding	c.1095+2T>C
8	27104016	G	T	splice_donor_variant&intron_variant	HIGH	CNTLN	ENSBTAG00000001847	ENSBTAT00000081095.1	protein_coding	c.983+2C>A
8	59358901	C	A	splice_acceptor_variant&intron_variant	HIGH	STOML2	ENSBTAG00000011388	ENSBTAT00000015136.5	protein_coding	c.805-1G>T
9	74611749	C	A	stop_gained&splice_region_variant	HIGH	MAP3K5	ENSBTAG00000009065	ENSBTAT00000011949.6	protein_coding	c.1990G>T	p.Glu664*
9	93737913	C	G	stop_lost&splice_region_variant	HIGH	ENSBTAG00000045772	ENSBTAG00000045772	ENSBTAT00000063435.2	protein_coding	c.1122G>C	p.Ter374Tyrext*?
9	23049631	G	C	splice_donor_variant&intron_variant	HIGH	DOP1A	ENSBTAG00000000676	ENSBTAT00000085183.1	protein_coding	c.2616+1G>C
9	96065741	C	T	stop_gained	HIGH	PNLDC1	ENSBTAG00000015166	ENSBTAT00000020180.5	protein_coding	c.181C>T	p.Gln61*
9	96253246	C	A	splice_donor_variant&intron_variant	HIGH	IGF2R	ENSBTAG00000002402	ENSBTAT00000037678.4	protein_coding	c.2075+2C>A
9	83075506	C	T	stop_gained	HIGH	FBXO30	ENSBTAG00000005376	ENSBTAT00000007075.4	protein_coding	c.1101G>A	p.Trp367*
9	101856811	G	A	stop_gained	HIGH	ENSBTAG00000054087	ENSBTAG00000054087	ENSBTAT00000086944.1	protein_coding	c.13C>T	p.Arg5*
10	79434741	A	T	stop_gained	HIGH	PLEKHH1	ENSBTAG00000018297	ENSBTAT00000024351.6	protein_coding	c.166A>T	p.Arg56*
10	85779767	C	T	splice_donor_variant&intron_variant	HIGH	NPC2	ENSBTAG00000021955	ENSBTAT00000029271.3	protein_coding	c.190+1G>A
10	79255581	G	A	splice_acceptor_variant&intron_variant	HIGH	EIF2S1	ENSBTAG00000016311	ENSBTAT00000043322.2	protein_coding	c.-240-1G>A
10	67655348	T	A	stop_gained&splice_region_variant	HIGH	DLGAP5	ENSBTAG00000002331	ENSBTAT00000003008.6	protein_coding	c.1300A>T	p.Arg434*
10	22810710	C	T	stop_gained	HIGH	ENSBTAG00000047690	ENSBTAG00000047690	ENSBTAT00000065378.2	protein_coding	c.211C>T	p.Gln71*
10	38289781	G	A	stop_gained	HIGH	UBR1	ENSBTAG00000021087	ENSBTAT00000028086.5	protein_coding	c.883C>T	p.Gln295*
10	36946666	C	G	splice_donor_variant&intron_variant	HIGH	RPAP1	ENSBTAG00000001693	ENSBTAT00000081849.1	protein_coding	c.1917+1G>C
10	38025204	A	T	splice_donor_variant&intron_variant	HIGH	CDAN1	ENSBTAG00000005751	ENSBTAT00000007561.6	protein_coding	c.2416+2T>A
10	36024650	T	C	splice_donor_variant&intron_variant	HIGH	IVD	ENSBTAG00000004409	ENSBTAT00000005782.4	protein_coding	c.366+2T>C
10	85898102	C	T	stop_gained	HIGH	ENSBTAG00000050205	ENSBTAG00000050205	ENSBTAT00000067059.1	protein_coding	c.496C>T	p.Gln166*
10	20991212	C	T	splice_donor_variant&intron_variant	HIGH	IRF9	ENSBTAG00000005816	ENSBTAT00000036455.5	protein_coding	c.59+1G>A
10	43625847	A	G	splice_donor_variant&intron_variant	HIGH	NIN	ENSBTAG00000020281	ENSBTAT00000068471.1	protein_coding	c.4763+2T>C
10	70731530	G	T	stop_gained	HIGH	KIAA0586	ENSBTAG00000004631	ENSBTAT00000008528.6	protein_coding	c.2290G>T	p.Glu764*
10	36390048	G	A	splice_donor_variant&intron_variant	HIGH	SPINT1	ENSBTAG00000004086	ENSBTAT00000045851.2	protein_coding	c.1270+1G>A
10	36390049	T	A	splice_donor_variant&intron_variant	HIGH	SPINT1	ENSBTAG00000004086	ENSBTAT00000045851.2	protein_coding	c.1270+2T>A
10	68726533	C	A	stop_gained	HIGH	PELI2	ENSBTAG00000005141	ENSBTAT00000067567.1	protein_coding	c.915C>A	p.Cys305*
10	20842572	G	T	stop_gained	HIGH	ADCY4	ENSBTAG00000018419	ENSBTAT00000076167.1	protein_coding	c.1207G>T	p.Gly403*
10	26648495	C	T	splice_acceptor_variant&intron_variant	HIGH	ENSBTAG00000037452	ENSBTAG00000037452	ENSBTAT00000051987.3	protein_coding	c.54-1G>A
10	21464063	C	T	splice_donor_variant&intron_variant	HIGH	NGDN	ENSBTAG00000009595	ENSBTAT00000012628.4	protein_coding	c.367+1G>A
10	51530110	T	G	stop_lost&splice_region_variant	HIGH	ENSBTAG00000049189	ENSBTAG00000049189	ENSBTAT00000072352.1	protein_coding	c.493T>G	p.Ter165Gluext*?
10	85779766	A	T	splice_donor_variant&intron_variant	HIGH	NPC2	ENSBTAG00000021955	ENSBTAT00000029271.3	protein_coding	c.190+2T>A
11	14833091	A	G	splice_donor_variant&intron_variant	HIGH	NLRC4	ENSBTAG00000008223	ENSBTAT00000010814.4	protein_coding	c.2761+2T>C
11	75112973	G	T	stop_gained	HIGH	ATAD2B	ENSBTAG00000017255	ENSBTAT00000022935.6	protein_coding	c.490G>T	p.Glu164*
11	96111274	T	C	splice_donor_variant&intron_variant	HIGH	RABEPK	ENSBTAG00000015098	ENSBTAT00000020093.5	protein_coding	c.676+2T>C
11	102942117	G	A	stop_gained	HIGH	TSC1	ENSBTAG00000005190	ENSBTAT00000006842.5	protein_coding	c.1231C>T	p.Gln411*
11	104565359	G	C	stop_gained	HIGH	SARDH	ENSBTAG00000004510	ENSBTAT00000075705.1	protein_coding	c.1133C>G	p.Ser378*
11	105985844	C	T	stop_gained	HIGH	C8G	ENSBTAG00000052909	ENSBTAT00000084848.1	protein_coding	c.61C>T	p.Gln21*
11	6716398	T	A	splice_donor_variant&intron_variant	HIGH	IL1R2	ENSBTAG00000006343	ENSBTAT00000008322.6	protein_coding	c.679+2T>A
11	6716397	G	A	splice_donor_variant&intron_variant	HIGH	IL1R2	ENSBTAG00000006343	ENSBTAT00000008322.6	protein_coding	c.679+1G>A
11	74881295	C	G	stop_gained	HIGH	ITSN2	ENSBTAG00000023172	ENSBTAT00000029334.6	protein_coding	c.1827C>G	p.Tyr609*
11	28966898	C	A	stop_gained	HIGH	ATP6V1E2	ENSBTAG00000013734	ENSBTAT00000018250.4	protein_coding	c.127G>T	p.Gly43*
11	2948467	A	T	splice_donor_variant&intron_variant	HIGH	COX5B	ENSBTAG00000053107	ENSBTAT00000076309.1	protein_coding	c.277+2T>A
11	68138092	T	C	splice_donor_variant&intron_variant	HIGH	ANXA4	ENSBTAG00000001105	ENSBTAT00000001463.4	protein_coding	c.91+2T>C
11	60336404	A	G	stop_lost&splice_region_variant	HIGH	ENSBTAG00000039218	ENSBTAG00000039218	ENSBTAT00000053032.3	protein_coding	c.496T>C	p.Ter166Argext*?
11	100211007	A	T	splice_donor_variant&intron_variant	HIGH	C11H9orf78	ENSBTAG00000020307	ENSBTAT00000027065.4	protein_coding	c.272+2T>A
11	82921596	G	A	splice_donor_variant&intron_variant	HIGH	PSMD13	ENSBTAG00000002045	ENSBTAT00000002650.6	protein_coding	c.1035+1G>A
11	66805120	A	C	splice_acceptor_variant&intron_variant	HIGH	PLEK	ENSBTAG00000009658	ENSBTAT00000012724.6	protein_coding	c.658-2A>C
11	63614544	A	C	splice_acceptor_variant&intron_variant	HIGH	ACTR2	ENSBTAG00000009761	ENSBTAT00000078525.1	protein_coding	c.485-2A>C
11	63614545	G	T	splice_acceptor_variant&intron_variant	HIGH	ACTR2	ENSBTAG00000009761	ENSBTAT00000078525.1	protein_coding	c.485-1G>T
11	11363122	C	T	stop_gained	HIGH	RAB11FIP5	ENSBTAG00000006162	ENSBTAT00000008106.6	protein_coding	c.3154C>T	p.Arg1052*
11	66805121	G	T	splice_acceptor_variant&intron_variant	HIGH	PLEK	ENSBTAG00000009658	ENSBTAT00000012724.6	protein_coding	c.658-1G>T
11	14833092	C	A	splice_donor_variant&intron_variant	HIGH	NLRC4	ENSBTAG00000008223	ENSBTAT00000010814.4	protein_coding	c.2761+1G>T
11	105984124	G	A	stop_gained	HIGH	FBXW5	ENSBTAG00000010515	ENSBTAT00000078511.1	protein_coding	c.301C>T	p.Arg101*
12	72728882	C	T	stop_gained	HIGH	ENSBTAG00000023309	ENSBTAG00000023309	ENSBTAT00000035482.5	protein_coding	c.2801G>A	p.Trp934*
12	28841367	G	A	stop_gained	HIGH	FRY	ENSBTAG00000006771	ENSBTAT00000035734.5	protein_coding	c.3346C>T	p.Gln1116*
12	19028327	C	G	stop_gained	HIGH	SETDB2	ENSBTAG00000007329	ENSBTAT00000009641.6	protein_coding	c.269C>G	p.Ser90*
12	35863092	C	A	stop_gained	HIGH	IFT88	ENSBTAG00000014286	ENSBTAT00000078675.1	protein_coding	c.2095G>T	p.Glu699*
12	28788510	G	T	stop_gained	HIGH	FRY	ENSBTAG00000006771	ENSBTAT00000035734.5	protein_coding	c.6756C>A	p.Tyr2252*
12	72826494	C	T	splice_acceptor_variant&intron_variant	HIGH	ENSBTAG00000023309	ENSBTAG00000023309	ENSBTAT00000035482.5	protein_coding	c.1247-1G>A
13	73399064	T	G	splice_donor_variant&intron_variant	HIGH	STK4	ENSBTAG00000003257	ENSBTAT00000004221.5	protein_coding	c.960+2T>G
13	46434577	C	T	stop_gained	HIGH	LARP4B	ENSBTAG00000013899	ENSBTAT00000086707.1	protein_coding	c.850C>T	p.Gln284*
13	65313084	G	T	stop_gained	HIGH	EPB41L1	ENSBTAG00000001640	ENSBTAT00000002151.6	protein_coding	c.751G>T	p.Glu251*
13	64630803	C	T	splice_acceptor_variant&intron_variant	HIGH	UQCC1	ENSBTAG00000030990	ENSBTAT00000067982.1	protein_coding	c.401-1G>A
13	52352518	C	T	stop_gained	HIGH	PCED1A	ENSBTAG00000003863	ENSBTAT00000005039.6	protein_coding	c.1255C>T	p.Gln419*
13	81642933	T	C	splice_donor_variant&intron_variant	HIGH	PFDN4	ENSBTAG00000008812	ENSBTAT00000080735.1	protein_coding	c.381+2T>C
13	52518237	T	C	splice_donor_variant&intron_variant	HIGH	IDH3B	ENSBTAG00000018813	ENSBTAT00000025044.4	protein_coding	c.1010+2T>C
13	46469802	C	A	splice_donor_variant&intron_variant	HIGH	LARP4B	ENSBTAG00000013899	ENSBTAT00000086707.1	protein_coding	c.4007+2C>A
13	2340624	G	T	stop_gained&splice_region_variant	HIGH	PLCB4	ENSBTAG00000013116	ENSBTAT00000017447.6	protein_coding	c.85G>T	p.Glu29*
13	61321196	G	T	stop_gained	HIGH	TPX2	ENSBTAG00000018775	ENSBTAT00000086117.1	protein_coding	c.829G>T	p.Glu277*
13	54051561	T	G	splice_donor_variant&intron_variant	HIGH	ARFRP1	ENSBTAG00000007497	ENSBTAT00000009858.4	protein_coding	c.346+2T>G
13	54051560	G	A	splice_donor_variant&intron_variant	HIGH	ARFRP1	ENSBTAG00000007497	ENSBTAT00000009858.4	protein_coding	c.346+1G>A
14	37325527	C	T	stop_gained	HIGH	ENSBTAG00000048533	ENSBTAG00000048533	ENSBTAT00000075169.1	protein_coding	c.1030C>T	p.Arg344*
14	21953737	T	C	splice_donor_variant&intron_variant	HIGH	RGS20	ENSBTAG00000003454	ENSBTAT00000004487.6	protein_coding	c.936+2T>C
14	21953736	G	C	splice_donor_variant&intron_variant	HIGH	RGS20	ENSBTAG00000003454	ENSBTAT00000004487.6	protein_coding	c.936+1G>C
14	891479	C	T	stop_gained	HIGH	PLEC	ENSBTAG00000011922	ENSBTAT00000082561.1	protein_coding	c.10084C>T	p.Gln3362*
14	1014360	A	G	splice_donor_variant&intron_variant	HIGH	IQANK1	ENSBTAG00000048486	ENSBTAT00000085613.1	protein_coding	c.465+2T>C
14	56257321	T	C	splice_donor_variant&intron_variant	HIGH	EIF3E	ENSBTAG00000006702	ENSBTAT00000081082.1	protein_coding	c.366+2T>C
14	56257320	G	T	splice_donor_variant&intron_variant	HIGH	EIF3E	ENSBTAG00000006702	ENSBTAT00000081082.1	protein_coding	c.366+1G>T
15	55927664	C	T	stop_gained	HIGH	EMSY	ENSBTAG00000010826	ENSBTAT00000014362.6	protein_coding	c.3778C>T	p.Gln1260*
15	29021163	C	A	splice_acceptor_variant&intron_variant	HIGH	CD3D	ENSBTAG00000006452	ENSBTAT00000008462.5	protein_coding	c.266-1G>T
15	29021164	T	G	splice_acceptor_variant&intron_variant	HIGH	CD3D	ENSBTAG00000006452	ENSBTAT00000008462.5	protein_coding	c.266-2A>C
15	47812762	C	T	splice_acceptor_variant&intron_variant	HIGH	ENSBTAG00000005609	ENSBTAG00000005609	ENSBTAT00000040169.5	protein_coding	c.874-1G>A
15	32205079	A	T	splice_acceptor_variant&intron_variant	HIGH	SORL1	ENSBTAG00000014611	ENSBTAT00000019457.6	protein_coding	c.5716-2A>T
15	53575920	C	T	splice_donor_variant&intron_variant	HIGH	C2CD3	ENSBTAG00000054229	ENSBTAT00000070798.1	protein_coding	c.337+1G>A
15	8285861	T	C	start_lost	HIGH	ARHGAP42	ENSBTAG00000004423	ENSBTAT00000081166.1	protein_coding	c.1A>G	p.Met1?
15	22484808	C	G	splice_donor_variant&intron_variant	HIGH	IL18	ENSBTAG00000000277	ENSBTAT00000065052.2	protein_coding	c.79+1G>C
15	77191451	C	T	splice_acceptor_variant&intron_variant	HIGH	MYBPC3	ENSBTAG00000021707	ENSBTAT00000082241.1	protein_coding	c.1170-1G>A
15	77375942	C	A	stop_gained	HIGH	KBTBD4	ENSBTAG00000018482	ENSBTAT00000024595.6	protein_coding	c.763G>T	p.Glu255*
15	66880782	T	C	splice_donor_variant&intron_variant	HIGH	PRR5L	ENSBTAG00000021029	ENSBTAT00000028004.6	protein_coding	c.294+2T>C
15	28072247	G	A	splice_acceptor_variant&intron_variant	HIGH	CEP164	ENSBTAG00000014137	ENSBTAT00000081477.1	protein_coding	c.5411-1G>A
15	47894922	G	A	stop_gained&splice_region_variant	HIGH	TRIM34	ENSBTAG00000037465	ENSBTAT00000007366.4	protein_coding	c.742C>T	p.Gln248*
15	63961538	C	T	stop_gained	HIGH	HIPK3	ENSBTAG00000014884	ENSBTAT00000039686.5	protein_coding	c.3151C>T	p.Gln1051*
15	46232342	G	T	stop_gained	HIGH	ENSBTAG00000037937	ENSBTAG00000037937	ENSBTAT00000055625.3	protein_coding	c.3262G>T	p.Glu1088*
15	33480207	C	T	stop_gained	HIGH	CRTAM	ENSBTAG00000005193	ENSBTAT00000076490.1	protein_coding	c.907C>T	p.Gln303*
15	27527640	G	A	stop_gained	HIGH	SIK3	ENSBTAG00000015119	ENSBTAT00000020116.5	protein_coding	c.2671C>T	p.Gln891*
15	47812298	G	A	stop_gained	HIGH	ENSBTAG00000005609	ENSBTAG00000005609	ENSBTAT00000040169.5	protein_coding	c.1294C>T	p.Gln432*
15	33423179	C	T	stop_gained	HIGH	UBASH3B	ENSBTAG00000000842	ENSBTAT00000001118.5	protein_coding	c.1063C>T	p.Gln355*
16	43257653	G	A	stop_gained	HIGH	ENSBTAG00000054239	ENSBTAG00000054239	ENSBTAT00000086287.1	protein_coding	c.2812C>T	p.Gln938*
16	30576618	T	C	splice_donor_variant&intron_variant	HIGH	ENSBTAG00000049714	ENSBTAG00000049714	ENSBTAT00000073773.1	protein_coding	c.2433+2T>C
16	77660482	T	A	splice_donor_variant&intron_variant	HIGH	PTPRC	ENSBTAG00000023144	ENSBTAT00000013320.6	protein_coding	c.2886+2T>A
16	75584475	G	A	stop_gained	HIGH	CD46	ENSBTAG00000005397	ENSBTAT00000073079.1	protein_coding	c.1294C>T	p.Gln432*
16	77660481	G	A	splice_donor_variant&intron_variant	HIGH	PTPRC	ENSBTAG00000023144	ENSBTAT00000013320.6	protein_coding	c.2886+1G>A
16	26603369	G	A	stop_gained	HIGH	TLR5	ENSBTAG00000000477	ENSBTAT00000000604.6	protein_coding	c.412C>T	p.Arg138*
16	12176344	T	A	stop_gained	HIGH	RO60	ENSBTAG00000013812	ENSBTAT00000018350.6	protein_coding	c.1291A>T	p.Lys431*
16	32203230	C	A	stop_gained	HIGH	EFCAB2	ENSBTAG00000024555	ENSBTAT00000034177.5	protein_coding	c.409G>T	p.Glu137*
16	4978267	C	A	stop_gained	HIGH	C4BPA	ENSBTAG00000009876	ENSBTAT00000013024.6	protein_coding	c.1605C>A	p.Tyr535*
16	29857150	G	A	splice_donor_variant&intron_variant	HIGH	PSEN2	ENSBTAG00000013197	ENSBTAT00000017565.6	protein_coding	c.141+1G>A
16	64153838	C	A	stop_gained	HIGH	LAMC1	ENSBTAG00000011966	ENSBTAT00000015881.6	protein_coding	c.2175C>A	p.Cys725*
16	4741375	T	G	stop_lost	HIGH	FCAMR	ENSBTAG00000019799	ENSBTAT00000026382.5	protein_coding	c.1649A>C	p.Ter550Serext*?
17	46347171	G	A	splice_donor_variant&intron_variant	HIGH	STX2	ENSBTAG00000007988	ENSBTAT00000061491.3	protein_coding	c.537+1G>A
17	46347172	T	A	splice_donor_variant&intron_variant	HIGH	STX2	ENSBTAG00000007988	ENSBTAT00000061491.3	protein_coding	c.537+2T>A
17	55377769	C	T	stop_gained	HIGH	ENSBTAG00000048331	ENSBTAG00000048331	ENSBTAT00000080862.1	protein_coding	c.1378C>T	p.Gln460*
17	12046085	C	T	stop_gained	HIGH	SLC10A7	ENSBTAG00000034522	ENSBTAT00000066896.1	protein_coding	c.562C>T	p.Arg188*
17	52250095	C	T	stop_gained	HIGH	SBNO1	ENSBTAG00000020505	ENSBTAT00000027325.6	protein_coding	c.241C>T	p.Gln81*
17	17136162	T	C	splice_donor_variant&intron_variant	HIGH	TBC1D9	ENSBTAG00000018951	ENSBTAT00000029790.5	protein_coding	c.2899+2T>C
17	70276010	G	A	stop_gained	HIGH	SFI1	ENSBTAG00000008996	ENSBTAT00000081845.1	protein_coding	c.692G>A	p.Trp231*
17	67985132	C	A	stop_gained	HIGH	CHEK2	ENSBTAG00000004956	ENSBTAT00000006518.4	protein_coding	c.1051G>T	p.Glu351*
17	52055548	C	A	splice_donor_variant&intron_variant	HIGH	EIF2B1	ENSBTAG00000007269	ENSBTAT00000009560.5	protein_coding	c.482+2C>A
17	52055547	G	T	splice_donor_variant&intron_variant	HIGH	EIF2B1	ENSBTAG00000007269	ENSBTAT00000009560.5	protein_coding	c.482+1G>T
17	62142549	A	G	start_lost	HIGH	TMEM116	ENSBTAG00000006659	ENSBTAT00000052812.2	protein_coding	c.1A>G	p.Met1?
17	68549672	C	G	splice_donor_variant&intron_variant	HIGH	RHBDD3	ENSBTAG00000017750	ENSBTAT00000072357.1	protein_coding	c.637+1G>C
17	29732889	C	A	splice_donor_variant&intron_variant	HIGH	ABHD18	ENSBTAG00000010630	ENSBTAT00000014052.6	protein_coding	c.-18+1G>T
17	61034643	A	T	splice_acceptor_variant&intron_variant	HIGH	SDS	ENSBTAG00000031814	ENSBTAT00000045109.3	protein_coding	c.487-2A>T
17	70317681	G	C	splice_donor_variant&intron_variant	HIGH	SFI1	ENSBTAG00000008996	ENSBTAT00000081845.1	protein_coding	c.2421+1G>C
17	72794549	T	C	splice_donor_variant&intron_variant	HIGH	SEPTIN5	ENSBTAG00000008320	ENSBTAT00000079805.1	protein_coding	c.151+2T>C
17	52269567	T	C	splice_donor_variant&intron_variant	HIGH	SBNO1	ENSBTAG00000020505	ENSBTAT00000027325.6	protein_coding	c.2125+2T>C
18	61224094	C	T	stop_gained	HIGH	ENSBTAG00000015061	ENSBTAG00000015061	ENSBTAT00000075926.1	protein_coding	c.1516C>T	p.Gln506*
18	62368995	G	C	splice_acceptor_variant&intron_variant	HIGH	ENSBTAG00000050944	ENSBTAG00000050944	ENSBTAT00000087243.1	pseudogene	n.1229-1G>C
18	62721215	T	G	splice_acceptor_variant&intron_variant	HIGH	ENSBTAG00000047270	ENSBTAG00000047270	ENSBTAT00000018094.6	protein_coding	c.509-2A>C
18	51866544	A	G	splice_donor_variant&intron_variant	HIGH	PLAUR	ENSBTAG00000013125	ENSBTAT00000017446.5	protein_coding	c.739+2T>C
18	34353491	G	A	splice_donor_variant&intron_variant	HIGH	CMTM3	ENSBTAG00000054188	ENSBTAT00000068609.1	protein_coding	c.520+1G>A
18	34353492	T	G	splice_donor_variant&intron_variant	HIGH	CMTM3	ENSBTAG00000054188	ENSBTAT00000068609.1	protein_coding	c.520+2T>G
18	60325966	C	T	stop_gained	HIGH	ENSBTAG00000034090	ENSBTAG00000034090	ENSBTAT00000073795.1	protein_coding	c.272G>A	p.Trp91*
18	63289512	G	C	splice_donor_variant&intron_variant	HIGH	OSCAR	ENSBTAG00000001051	ENSBTAT00000001395.6	protein_coding	c.713+1G>C
18	62536954	A	G	splice_donor_variant&intron_variant	HIGH	FCAR	ENSBTAG00000021647	ENSBTAT00000028846.3	protein_coding	c.70+2T>C
18	47469903	A	T	stop_gained	HIGH	ZNF570	ENSBTAG00000000472	ENSBTAT00000000598.6	protein_coding	c.481A>T	p.Arg161*
18	47221656	A	G	start_lost	HIGH	ENSBTAG00000050438	ENSBTAG00000050438	ENSBTAT00000064085.2	protein_coding	c.1A>G	p.Met1?
18	54882072	G	A	stop_gained	HIGH	LIG1	ENSBTAG00000014595	ENSBTAT00000031920.5	protein_coding	c.1087C>T	p.Gln363*
18	62092666	A	C	splice_acceptor_variant&intron_variant	HIGH	UBE2S	ENSBTAG00000009211	ENSBTAT00000078219.1	protein_coding	c.400-2A>C
18	62092667	G	T	splice_acceptor_variant&intron_variant	HIGH	UBE2S	ENSBTAG00000009211	ENSBTAT00000078219.1	protein_coding	c.400-1G>T
18	53693924	C	T,A	stop_gained	HIGH	CCDC8	ENSBTAG00000018181	ENSBTAT00000024194.6	protein_coding	c.1217C>A	p.Ser406*
18	12999393	A	T	stop_gained	HIGH	ZCCHC14	ENSBTAG00000014267	ENSBTAT00000074957.1	protein_coding	c.939T>A	p.Tyr313*
18	56933183	G	A	stop_gained	HIGH	KLK5	ENSBTAG00000015125	ENSBTAT00000027772.6	protein_coding	c.802C>T	p.Gln268*
18	48609984	C	G	splice_donor_variant&intron_variant	HIGH	SIRT2	ENSBTAG00000001776	ENSBTAT00000002327.6	protein_coding	c.223+1G>C
18	24034738	C	T	splice_acceptor_variant&intron_variant	HIGH	MT1E	ENSBTAG00000001595	ENSBTAT00000082722.1	protein_coding	c.29-2G>A
18	48609983	A	G	splice_donor_variant&intron_variant	HIGH	SIRT2	ENSBTAG00000001776	ENSBTAT00000002327.6	protein_coding	c.223+2T>C
18	36819158	C	A	splice_acceptor_variant&intron_variant	HIGH	NOB1	ENSBTAG00000020633	ENSBTAT00000027497.3	protein_coding	c.197-1G>T
18	36819159	T	G	splice_acceptor_variant&intron_variant	HIGH	NOB1	ENSBTAG00000020633	ENSBTAT00000027497.3	protein_coding	c.197-2A>C
18	60922124	G	A	stop_gained	HIGH	NLRP12	ENSBTAG00000038149	ENSBTAT00000057509.3	protein_coding	c.793C>T	p.Arg265*
18	2303313	G	C	stop_gained	HIGH	WDR59	ENSBTAG00000016878	ENSBTAT00000074610.1	protein_coding	c.663C>G	p.Tyr221*
18	62971872	G	A	stop_gained	HIGH	ENSBTAG00000038797	ENSBTAG00000038797	ENSBTAT00000075141.1	protein_coding	c.99G>A	p.Trp33*
18	61935247	C	A	splice_donor_variant&intron_variant	HIGH	ZNF524	ENSBTAG00000012333	ENSBTAT00000076816.1	protein_coding	c.511+2G>T
18	57623801	G	A	stop_gained	HIGH	ENSBTAG00000050510	ENSBTAG00000050510	ENSBTAT00000081334.1	protein_coding	c.538C>T	p.Gln180*
19	62550526	G	A	stop_gained	HIGH	CEP112	ENSBTAG00000033680	ENSBTAT00000061482.3	protein_coding	c.664C>T	p.Gln222*
19	20032593	A	G	splice_donor_variant&intron_variant	HIGH	ALDOC	ENSBTAG00000013099	ENSBTAT00000017416.5	protein_coding	c.550+2T>C
19	26078631	A	T	splice_acceptor_variant&intron_variant	HIGH	DERL2	ENSBTAG00000020431	ENSBTAT00000069122.1	protein_coding	c.-58-2A>T
19	40452725	T	G,C	splice_donor_variant&intron_variant	HIGH	CASC3	ENSBTAG00000006250	ENSBTAT00000079130.1	protein_coding	c.*40+2T>C
19	27113978	C	T	stop_gained	HIGH	ENSBTAG00000050569	ENSBTAG00000050569	ENSBTAT00000075255.1	protein_coding	c.284G>A	p.Trp95*
19	61341701	G	T	stop_gained	HIGH	ABCA5	ENSBTAG00000002747	ENSBTAT00000003563.6	protein_coding	c.4681G>T	p.Glu1561*
19	52106237	T	C	splice_acceptor_variant&intron_variant	HIGH	ENDOV	ENSBTAG00000015339	ENSBTAT00000068995.1	protein_coding	c.586-2A>G
19	52106236	C	T	splice_acceptor_variant&intron_variant	HIGH	ENDOV	ENSBTAG00000015339	ENSBTAT00000068995.1	protein_coding	c.586-1G>A
19	55703647	T	G	splice_donor_variant&intron_variant	HIGH	FBF1	ENSBTAG00000030175	ENSBTAT00000029359.6	protein_coding	c.677+2T>G
19	48045466	C	A	splice_donor_variant&intron_variant	HIGH	DDX42	ENSBTAG00000021058	ENSBTAT00000028046.6	protein_coding	c.372+2C>A
19	40452724	G	T	splice_donor_variant&intron_variant	HIGH	CASC3	ENSBTAG00000006250	ENSBTAT00000079130.1	protein_coding	c.*40+1G>T
19	48205929	G	A	stop_gained	HIGH	ENSBTAG00000019432	ENSBTAG00000019432	ENSBTAT00000078992.1	protein_coding	c.568C>T	p.Gln190*
19	49182320	A	G,T	stop_gained	HIGH	NOL11	ENSBTAG00000015951	ENSBTAT00000021210.5	protein_coding	c.942T>A	p.Tyr314*
19	20824217	C	T	stop_gained&splice_region_variant	HIGH	TP53I13	ENSBTAG00000014687	ENSBTAT00000073231.1	protein_coding	c.313C>T	p.Gln105*
19	17955299	G	A	splice_donor_variant&intron_variant	HIGH	RHOT1	ENSBTAG00000010001	ENSBTAT00000069305.1	protein_coding	c.243+2C>T
19	24948294	C	A	stop_gained	HIGH	SPNS3	ENSBTAG00000016175	ENSBTAT00000035119.5	protein_coding	c.630C>A	p.Cys210*
19	9663061	G	T	stop_gained	HIGH	RAD51C	ENSBTAG00000015036	ENSBTAT00000020012.6	protein_coding	c.187G>T	p.Glu63*
19	61475658	G	T	splice_donor_variant&intron_variant	HIGH	ABCA6	ENSBTAG00000006921	ENSBTAT00000067127.1	protein_coding	c.3824+1G>T
19	56258247	C	A	splice_donor_variant&intron_variant	HIGH	NUP85	ENSBTAG00000016126	ENSBTAT00000034688.5	protein_coding	c.290+1G>T
19	40903470	G	T	stop_gained	HIGH	KRT24	ENSBTAG00000040279	ENSBTAT00000027749.5	protein_coding	c.1397C>A	p.Ser466*
19	39442302	A	T	splice_donor_variant&intron_variant	HIGH	RPL23	ENSBTAG00000003229	ENSBTAT00000004190.5	protein_coding	c.97+2T>A
19	35128211	A	T	splice_donor_variant&intron_variant	HIGH	USP22	ENSBTAG00000008978	ENSBTAT00000011818.6	protein_coding	c.1289+2T>A
19	43461987	A	C	start_lost	HIGH	ETV4	ENSBTAG00000008333	ENSBTAT00000010973.5	protein_coding	c.2T>G	p.Met1?
19	18107527	T	C	start_lost	HIGH	CRLF3	ENSBTAG00000018381	ENSBTAT00000024457.6	protein_coding	c.2T>C	p.Met1?
19	20107291	G	A	splice_donor_variant&intron_variant	HIGH	SUPT6H	ENSBTAG00000009036	ENSBTAT00000068168.1	protein_coding	c.109+1G>A
19	55703545	C	T	stop_gained	HIGH	FBF1	ENSBTAG00000030175	ENSBTAT00000029359.6	protein_coding	c.577C>T	p.Arg193*
19	48236721	G	A	stop_gained	HIGH	ENSBTAG00000019432	ENSBTAG00000019432	ENSBTAT00000078625.1	protein_coding	c.799C>T	p.Gln267*
19	42041340	G	A	stop_gained	HIGH	KLHL11	ENSBTAG00000050549	ENSBTAT00000069567.1	protein_coding	c.2059C>T	p.Gln687*
20	9382117	T	G	splice_donor_variant&intron_variant	HIGH	MRPS27	ENSBTAG00000001962	ENSBTAT00000002549.5	protein_coding	c.856+2T>G
20	39227644	A	C	splice_donor_variant&intron_variant	HIGH	BRIX1	ENSBTAG00000019211	ENSBTAT00000086085.1	protein_coding	c.159+2T>G
20	36790456	T	A	stop_gained	HIGH	WDR70	ENSBTAG00000033095	ENSBTAT00000074472.1	protein_coding	c.1018A>T	p.Arg340*
20	65324850	A	G	splice_donor_variant&intron_variant	HIGH	MTRR	ENSBTAG00000009401	ENSBTAT00000012372.5	protein_coding	c.1051+2T>C
20	24073472	A	C	stop_lost	HIGH	GZMK	ENSBTAG00000005164	ENSBTAT00000006807.5	protein_coding	c.793T>G	p.Ter265Gluext*?
20	71835720	A	G	splice_donor_variant&intron_variant	HIGH	LRRC14B	ENSBTAG00000045954	ENSBTAT00000073029.1	protein_coding	c.433+2T>C
20	18281641	G	A	stop_gained	HIGH	NDUFAF2	ENSBTAG00000021607	ENSBTAT00000028793.5	protein_coding	c.139C>T	p.Arg47*
21	6544511	G	T	stop_gained	HIGH	ADAMTS17	ENSBTAG00000019823	ENSBTAT00000079673.1	protein_coding	c.1978G>T	p.Glu660*
21	68318454	T	A	splice_donor_variant&intron_variant	HIGH	ZFYVE21	ENSBTAG00000003556	ENSBTAT00000073944.1	protein_coding	c.138+2T>A
21	58693766	C	A	stop_gained	HIGH	ENSBTAG00000031834	ENSBTAG00000031834	ENSBTAT00000031857.3	protein_coding	c.350C>A	p.Ser117*
21	29231424	C	G	stop_lost&splice_region_variant	HIGH	ENSBTAG00000003957	ENSBTAG00000003957	ENSBTAT00000005175.5	protein_coding	c.878G>C	p.Ter293Serext*?
21	57392498	A	C	splice_donor_variant&intron_variant	HIGH	LGMN	ENSBTAG00000046979	ENSBTAT00000065983.2	protein_coding	c.318+2T>G
21	69352378	T	G	splice_donor_variant&intron_variant	HIGH	PLD4	ENSBTAG00000015160	ENSBTAT00000074483.1	protein_coding	c.564+2T>G
22	60520520	C	T	splice_acceptor_variant&intron_variant	HIGH	SLC41A3	ENSBTAG00000005617	ENSBTAT00000043678.4	protein_coding	c.1097-1G>A
22	58040383	G	A	splice_donor_variant&intron_variant	HIGH	XPC	ENSBTAG00000007362	ENSBTAT00000009683.5	protein_coding	c.88+1G>A
22	43853198	C	A	stop_gained	HIGH	APPL1	ENSBTAG00000006824	ENSBTAT00000008971.5	protein_coding	c.1924G>T	p.Glu642*
22	21240287	C	A	splice_acceptor_variant&intron_variant	HIGH	ARL8B	ENSBTAG00000012902	ENSBTAT00000085357.1	protein_coding	c.441-1G>T
22	50798980	T	C	splice_donor_variant&intron_variant	HIGH	USP4	ENSBTAG00000011899	ENSBTAT00000015787.6	protein_coding	c.2644+2T>C
22	52252324	C	T	stop_gained	HIGH	ENSBTAG00000051878	ENSBTAG00000051878	ENSBTAT00000072731.1	protein_coding	c.252G>A	p.Trp84*
22	54246406	G	A	stop_gained	HIGH	ZDHHC3	ENSBTAG00000011484	ENSBTAT00000078706.1	protein_coding	c.878G>A	p.Trp293*
22	43607550	G	A	start_lost	HIGH	ARF4	ENSBTAG00000016069	ENSBTAT00000074496.1	protein_coding	c.3G>A	p.Met1?
22	48594821	A	G	splice_donor_variant&intron_variant	HIGH	GLYCTK	ENSBTAG00000021695	ENSBTAT00000028914.6	protein_coding	c.-134+2T>C
22	52981420	T	G	splice_donor_variant&intron_variant	HIGH	LTF	ENSBTAG00000001292	ENSBTAT00000001704.5	protein_coding	c.1717+2T>G
23	28350551	G	C	stop_gained	HIGH	C23H6orf136	ENSBTAG00000006958	ENSBTAT00000035893.3	protein_coding	c.507C>G	p.Tyr169*
23	28055863	C	A	stop_gained	HIGH	ENSBTAG00000007075	ENSBTAG00000007075	ENSBTAT00000081596.1	protein_coding	c.362C>A	p.Ser121*
23	27874339	G	A	splice_donor_variant&intron_variant	HIGH	ENSBTAG00000012208	ENSBTAG00000012208	ENSBTAT00000016194.6	protein_coding	c.972+1G>A
23	16671518	C	G	splice_acceptor_variant&intron_variant	HIGH	CUL7	ENSBTAG00000012749	ENSBTAT00000061262.3	protein_coding	c.3619-1G>C
23	48889729	T	A	splice_donor_variant&intron_variant	HIGH	F13A1	ENSBTAG00000007268	ENSBTAT00000009559.5	protein_coding	c.1747+2T>A
23	48889728	G	C	splice_donor_variant&intron_variant	HIGH	F13A1	ENSBTAG00000007268	ENSBTAT00000009559.5	protein_coding	c.1747+1G>C
23	30535652	T	A	stop_gained	HIGH	ZKSCAN8	ENSBTAG00000007074	ENSBTAT00000009298.5	protein_coding	c.1153A>T	p.Lys385*
23	28943654	T	G	stop_lost	HIGH	MOG	ENSBTAG00000017818	ENSBTAT00000045078.3	protein_coding	c.402A>C	p.Ter134Tyrext*?
23	3663364	G	C	splice_acceptor_variant&intron_variant	HIGH	DST	ENSBTAG00000021237	ENSBTAT00000061451.3	protein_coding	c.2785-1G>C
23	15595548	G	A	splice_donor_variant&intron_variant	HIGH	ENSBTAG00000038916	ENSBTAG00000038916	ENSBTAT00000072668.1	protein_coding	c.-160+1G>A
23	47479954	A	C	splice_acceptor_variant&intron_variant	HIGH	TXNDC5	ENSBTAG00000019237	ENSBTAT00000076880.1	protein_coding	c.279-2A>C
23	9726401	C	T	stop_gained&splice_region_variant	HIGH	ARMC12	ENSBTAG00000010877	ENSBTAT00000014449.5	protein_coding	c.613C>T	p.Gln205*
23	39910976	G	A	stop_gained	HIGH	CAP2	ENSBTAG00000016924	ENSBTAT00000022510.6	protein_coding	c.361C>T	p.Gln121*
23	28056014	C	A	stop_gained	HIGH	ENSBTAG00000007075	ENSBTAG00000007075	ENSBTAT00000081596.1	protein_coding	c.513C>A	p.Cys171*
23	47479955	G	T	splice_acceptor_variant&intron_variant	HIGH	TXNDC5	ENSBTAG00000019237	ENSBTAT00000076880.1	protein_coding	c.279-1G>T
23	17812893	G	A	stop_gained	HIGH	AARS2	ENSBTAG00000013722	ENSBTAT00000018232.6	protein_coding	c.106C>T	p.Gln36*
23	3694541	G	T	splice_donor_variant&intron_variant	HIGH	DST	ENSBTAG00000021237	ENSBTAT00000061451.3	protein_coding	c.5519+1G>T
23	27834736	G	C	splice_acceptor_variant&intron_variant	HIGH	BoLA	ENSBTAG00000005182	ENSBTAT00000031166.5	protein_coding	c.1088-1G>C
23	48052766	A	T	splice_donor_variant&intron_variant	HIGH	RREB1	ENSBTAG00000005980	ENSBTAT00000044565.4	protein_coding	c.4726+2T>A
23	27829067	G	A	stop_gained	HIGH	ENSBTAG00000031905	ENSBTAG00000031905	ENSBTAT00000045242.3	protein_coding	c.180G>A	p.Trp60*
23	27874354	T	G	stop_lost&splice_region_variant	HIGH	ENSBTAG00000012208	ENSBTAG00000012208	ENSBTAT00000078245.1	protein_coding	c.988T>G	p.Ter330Gluext*?
23	29072963	A	C	stop_lost	HIGH	ENSBTAG00000025398	ENSBTAG00000025398	ENSBTAT00000080633.1	protein_coding	c.487T>G	p.Ter163Glyext*?
24	48619732	T	A	splice_acceptor_variant&intron_variant	HIGH	SMAD7	ENSBTAG00000012441	ENSBTAT00000073637.1	protein_coding	c.668-2A>T
24	61934399	A	C	stop_gained	HIGH	ENSBTAG00000048720	ENSBTAG00000048720	ENSBTAT00000053165.3	protein_coding	c.87T>G	p.Tyr29*
24	37156683	C	G	splice_acceptor_variant&intron_variant	HIGH	LPIN2	ENSBTAG00000012060	ENSBTAT00000067199.1	protein_coding	c.885-1G>C
25	1324356	T	A	splice_donor_variant&intron_variant	HIGH	MAPK8IP3	ENSBTAG00000002211	ENSBTAT00000078567.1	protein_coding	c.602+2T>A
25	1214229	G	A	stop_gained	HIGH	IFT140	ENSBTAG00000007245	ENSBTAT00000047406.4	protein_coding	c.2023C>T	p.Gln675*
25	3826071	G	T	stop_gained&splice_region_variant	HIGH	C25H16orf71	ENSBTAG00000006595	ENSBTAT00000008661.5	protein_coding	c.724G>T	p.Glu242*
25	25930825	C	A	stop_gained	HIGH	ATP2A1	ENSBTAG00000006541	ENSBTAT00000008593.6	protein_coding	c.2719G>T	p.Glu907*
25	28378953	T	A	start_lost&splice_region_variant	HIGH	TYW1	ENSBTAG00000008446	ENSBTAT00000011112.6	protein_coding	c.2T>A	p.Met1?
25	2524088	A	C	splice_acceptor_variant&intron_variant	HIGH	ENSBTAG00000048353	ENSBTAG00000048353	ENSBTAT00000067595.1	protein_coding	c.280-2A>C
25	37345567	T	A	stop_gained	HIGH	TRRAP	ENSBTAG00000007113	ENSBTAT00000009365.6	protein_coding	c.475A>T	p.Lys159*
25	35458935	G	A	splice_donor_variant&intron_variant	HIGH	FIS1	ENSBTAG00000007900	ENSBTAT00000070686.1	protein_coding	c.187+1G>A
25	35458936	T	G	splice_donor_variant&intron_variant	HIGH	FIS1	ENSBTAG00000007900	ENSBTAT00000070686.1	protein_coding	c.187+2T>G
25	1351665	A	T	splice_donor_variant&intron_variant	HIGH	MRPS34	ENSBTAG00000026415	ENSBTAT00000037541.2	protein_coding	c.1255+2T>A
25	33067621	G	A	stop_gained	HIGH	CLIP2	ENSBTAG00000011875	ENSBTAT00000015759.5	protein_coding	c.2482C>T	p.Gln828*
25	12852270	C	T	stop_gained	HIGH	ERCC4	ENSBTAG00000021773	ENSBTAT00000046336.4	protein_coding	c.1018C>T	p.Arg340*
25	27750298	A	T	stop_gained	HIGH	PHKG1	ENSBTAG00000008195	ENSBTAT00000078472.1	protein_coding	c.989T>A	p.Leu330*
26	18832458	C	T	stop_gained	HIGH	PI4K2A	ENSBTAG00000002010	ENSBTAT00000086746.1	protein_coding	c.928C>T	p.Gln310*
26	14641603	C	T	splice_acceptor_variant&intron_variant	HIGH	MYOF	ENSBTAG00000016918	ENSBTAT00000038965.5	protein_coding	c.5086-1G>A
26	13900691	C	T	splice_donor_variant&intron_variant	HIGH	IDE	ENSBTAG00000019759	ENSBTAT00000026332.5	protein_coding	c.2116+1G>A
26	42556162	G	T	splice_donor_variant&intron_variant	HIGH	SPADH1	ENSBTAG00000010796	ENSBTAT00000014297.4	protein_coding	c.400+1G>T
26	32824970	T	A	stop_gained	HIGH	TECTB	ENSBTAG00000006689	ENSBTAT00000046061.3	protein_coding	c.602T>A	p.Leu201*
26	42337890	T	C	splice_donor_variant&intron_variant	HIGH	HTRA1	ENSBTAG00000008389	ENSBTAT00000011042.5	protein_coding	c.1264+2T>C
26	32708673	G	T	stop_gained	HIGH	GPAM	ENSBTAG00000011917	ENSBTAT00000015811.5	protein_coding	c.764C>A	p.Ser255*
26	13507002	C	A	stop_gained	HIGH	BTAF1	ENSBTAG00000016104	ENSBTAT00000021438.6	protein_coding	c.818C>A	p.Ser273*
27	37170836	G	A	splice_acceptor_variant&intron_variant	HIGH	IKBKB	ENSBTAG00000007599	ENSBTAT00000071704.1	protein_coding	c.1525-1G>A
27	26867782	G	C	splice_donor_variant&intron_variant	HIGH	UBXN8	ENSBTAG00000004173	ENSBTAT00000005462.4	protein_coding	c.88+1G>C
27	7140758	A	G	stop_lost	HIGH	DEFB4A	ENSBTAG00000053557	ENSBTAT00000082114.1	protein_coding	c.191A>G	p.Ter64Trpext*?
27	6678163	A	C	stop_lost	HIGH	DEFB7	ENSBTAG00000051383	ENSBTAT00000018930.5	protein_coding	c.188A>C	p.Ter63Serext*?
27	6773176	G	A	stop_gained	HIGH	ENSBTAG00000052384	ENSBTAG00000052384	ENSBTAT00000071672.1	protein_coding	c.92G>A	p.Trp31*
27	7227861	G	A	stop_gained	HIGH	ENSBTAG00000053057	ENSBTAG00000053057	ENSBTAT00000074964.1	protein_coding	c.92G>A	p.Trp31*
27	39015735	C	A	stop_gained	HIGH	NAT1	ENSBTAG00000016473	ENSBTAT00000048506.4	protein_coding	c.583G>T	p.Glu195*
28	43637802	G	A	stop_gained	HIGH	ERCC6	ENSBTAG00000032527	ENSBTAT00000046144.4	protein_coding	c.3622C>T	p.Arg1208*
28	26329132	G	T	stop_gained	HIGH	H2AFY2	ENSBTAG00000001163	ENSBTAT00000001547.4	protein_coding	c.265G>T	p.Glu89*
29	40701808	C	T	stop_gained	HIGH	SCGB2A2	ENSBTAG00000015940	ENSBTAT00000081687.1	protein_coding	c.193C>T	p.Gln65*
29	9854151	A	G	splice_acceptor_variant&intron_variant	HIGH	SYTL2	ENSBTAG00000000460	ENSBTAT00000071933.1	protein_coding	c.2134-2A>G
29	42635046	G	C	splice_acceptor_variant&intron_variant	HIGH	CCDC88B	ENSBTAG00000040190	ENSBTAT00000074378.1	protein_coding	c.1786-1G>C
29	26378327	T	A	splice_donor_variant&intron_variant	HIGH	HPS5	ENSBTAG00000005147	ENSBTAT00000006797.5	protein_coding	c.1323+2T>A
29	44725909	C	G	splice_donor_variant&intron_variant	HIGH	SPTBN2	ENSBTAG00000005929	ENSBTAT00000007787.6	protein_coding	c.3867+1G>C
29	42650389	G	A	splice_donor_variant&intron_variant	HIGH	RPS6KA4	ENSBTAG00000039153	ENSBTAT00000020910.6	protein_coding	c.755+1G>A
29	46020305	T	C	splice_donor_variant&intron_variant	HIGH	PPP6R3	ENSBTAG00000009584	ENSBTAT00000012612.6	protein_coding	c.1343+2T>C
29	12418198	A	T	splice_donor_variant&intron_variant	HIGH	ANKRD42	ENSBTAG00000001391	ENSBTAT00000033977.5	protein_coding	c.1550+2T>A
NKLS02000657.1	99616	A	G	splice_acceptor_variant&intron_variant	HIGH	ULBP13	ENSBTAG00000048950	ENSBTAT00000074792.1	protein_coding	c.74-2A>G
NKLS02000657.1	102331	C	T	stop_gained	HIGH	ULBP13	ENSBTAG00000048950	ENSBTAT00000074792.1	protein_coding	c.805C>T	p.Arg269*
NKLS02000782.1	8630	C	T	stop_gained	HIGH	ENSBTAG00000054081	ENSBTAG00000054081	ENSBTAT00000077255.1	protein_coding	c.578G>A	p.Trp193*
NKLS02000910.1	91673	G	T	stop_gained	HIGH	ENSBTAG00000045751	ENSBTAG00000045751	ENSBTAT00000069831.1	protein_coding	c.2620G>T	p.Glu874*
NKLS02000910.1	630401	C	T	stop_gained	HIGH	ENSBTAG00000051896	ENSBTAG00000051896	ENSBTAT00000072850.1	protein_coding	c.2723G>A	p.Trp908*
NKLS02001064.1	662711	T	A	start_lost	HIGH	ENSBTAG00000049995	ENSBTAG00000049995	ENSBTAT00000077361.1	protein_coding	c.2T>A	p.Met1?
NKLS02001111.1	67141	T	A	stop_gained	HIGH	ENSBTAG00000055096	ENSBTAG00000055096	ENSBTAT00000052684.3	protein_coding	c.262A>T	p.Arg88*
NKLS02001494.1	516997	C	T	stop_gained	HIGH	ENSBTAG00000047764	ENSBTAG00000047764	ENSBTAT00000069301.1	protein_coding	c.2403G>A	p.Trp801*
NKLS02001545.1	99077	G	T	stop_gained	HIGH	TNFRSF10D	ENSBTAG00000051704	ENSBTAT00000065559.2	protein_coding	c.513C>A	p.Cys171*
NKLS02001928.1	506802	G	A	splice_acceptor_variant&intron_variant	HIGH	ENSBTAG00000052869	ENSBTAG00000052869	ENSBTAT00000068546.1	protein_coding	c.610-1G>A
NKLS02001967.1	72614	A	G	start_lost	HIGH	ENSBTAG00000049392	ENSBTAG00000049392	ENSBTAT00000079259.1	protein_coding	c.2T>C	p.Met1?
X	37399092	A	C	splice_donor_variant&intron_variant	HIGH	FLNA	ENSBTAG00000011190	ENSBTAT00000030194.5	protein_coding	c.7333+2T>G
X	35797204	C	T	splice_donor_variant&intron_variant	HIGH	VBP1	ENSBTAG00000017265	ENSBTAT00000022946.4	protein_coding	c.285+1G>A
X	121404634	G	T	splice_acceptor_variant&intron_variant	HIGH	ENSBTAG00000050483	ENSBTAG00000050483	ENSBTAT00000083104.1	pseudogene	n.217-1G>T
X	105609143	C	T	splice_donor_variant&intron_variant	HIGH	CYBB	ENSBTAG00000019953	ENSBTAT00000016904.5	protein_coding	c.1856+1G>A
X	32005309	G	A	stop_gained&splice_region_variant	HIGH	IDS	ENSBTAG00000011056	ENSBTAT00000014683.5	protein_coding	c.232C>T	p.Gln78*
X	18477354	C	T	stop_gained	HIGH	FAM122B	ENSBTAG00000001886	ENSBTAT00000086733.1	protein_coding	c.329G>A	p.Trp110*
X	119519887	T	G	splice_acceptor_variant&intron_variant	HIGH	PRDX4	ENSBTAG00000006165	ENSBTAT00000008107.3	protein_coding	c.486-2A>C

## Sheet: Indels
chr	Position	Ref	Mutated	Type	Impact	Symbol	GeneID	TranscriptID	Type	Var1	Var2
1	93683352	TC	T	frameshift_variant	HIGH	ENSBTAG00000012401	ENSBTAG00000012401	ENSBTAT00000016454.3	protein_coding	c.165delC	p.Cys56fs
1	107075677	ATT	AT	frameshift_variant	HIGH	SMC4	ENSBTAG00000005862	ENSBTAT00000007705.5	protein_coding	c.435delA	p.Ile146fs
1	143107130	C	CG	frameshift_variant	HIGH	WDR4	ENSBTAG00000021490	ENSBTAT00000073162.1	protein_coding	c.50_51insC	p.Ala19fs
1	57798786	TTATAT	TTAT	frameshift_variant	HIGH	ENSBTAG00000000242	ENSBTAG00000000242	ENSBTAT00000000299.2	protein_coding	c.531_532delAT	p.Tyr178fs
1	132924091	AGGGGGG	AGGGGG	frameshift_variant	HIGH	ENSBTAG00000052750	ENSBTAG00000052750	ENSBTAT00000074513.1	protein_coding	c.129delG	p.Leu44fs
2	43268381	TACA	TACAAACA	splice_acceptor_variant&splice_donor_variant&intron_variant	HIGH	ENSBTAG00000012816	ENSBTAG00000012816	ENSBTAT00000017023.4	pseudogene	n.714+1_715-1insTGTT
2	47422448	GCACACACACACAC	GCACACACACAC	splice_donor_variant&intron_variant	HIGH	EPC2	ENSBTAG00000018581	ENSBTAT00000024730.6	protein_coding	c.2351+1_2351+2delGT
2	38466739	TCCCC	TCCC	frameshift_variant	HIGH	ACVR1	ENSBTAG00000011909	ENSBTAT00000015797.5	protein_coding	c.290delC	p.Pro97fs
2	19261408	ATTT	ATT	frameshift_variant	HIGH	TTC30A	ENSBTAG00000027694	ENSBTAT00000039896.4	protein_coding	c.1969delT	p.Tyr657fs
2	106689400	CA	CAA	frameshift_variant	HIGH	TTLL4	ENSBTAG00000018415	ENSBTAT00000024502.4	protein_coding	c.109dupA	p.Thr37fs
3	33700124	CTGT	CT	frameshift_variant	HIGH	GSTM1	ENSBTAG00000017765	ENSBTAT00000075425.1	protein_coding	c.491_492delAC	p.Tyr164fs
3	14034498	TA	TAA	splice_acceptor_variant&intron_variant	HIGH	SH2D2A	ENSBTAG00000024470	ENSBTAT00000046702.3	protein_coding	c.781-2_781-1insA
3	7812716	ATGATT	AT	frameshift_variant	HIGH	ATF6	ENSBTAG00000005227	ENSBTAT00000061155.3	protein_coding	c.763_766delAATC	p.Asn255fs
3	15416534	CTGTG	CTG	frameshift_variant	HIGH	THBS3	ENSBTAG00000000057	ENSBTAT00000079983.1	protein_coding	c.125_126delTG	p.Val42fs
3	99897560	GCACA	GCA	frameshift_variant	HIGH	TSPAN1	ENSBTAG00000013320	ENSBTAT00000017715.3	protein_coding	c.195_196delTG	p.Val66fs
3	34154011	CATAT	CAT	frameshift_variant	HIGH	CELSR2	ENSBTAG00000018804	ENSBTAT00000025033.5	protein_coding	c.2964_2965delAT	p.Tyr989fs
3	43365761	ATTTTTTT	ATTTTTTTTT	frameshift_variant	HIGH	AGL	ENSBTAG00000006491	ENSBTAT00000008518.6	protein_coding	c.3904_3905insAA	p.Asn1304fs
3	7852711	TTCTCT	TTCT	frameshift_variant	HIGH	DUSP12	ENSBTAG00000021754	ENSBTAT00000028997.4	protein_coding	c.1012_1013delAG	p.Glu339fs
3	120840055	TCCC	TCC	frameshift_variant	HIGH	PDCD1	ENSBTAG00000011543	ENSBTAT00000079165.1	protein_coding	c.788delG	p.Glu264fs
3	21516722	TGG	TG	frameshift_variant	HIGH	NUDT17	ENSBTAG00000021635	ENSBTAT00000028830.5	protein_coding	c.450delC	p.Gln151fs
4	82572377	TGGAG	TG	stop_gained&disruptive_inframe_deletion	HIGH	ENSBTAG00000000144	ENSBTAG00000000144	ENSBTAT00000038934.5	protein_coding	c.891_893delGAG	p.Trp297_Arg298delinsTer
4	113285805	GAAAA	GAAAAA	frameshift_variant	HIGH	GIMAP7	ENSBTAG00000008550	ENSBTAT00000043789.3	protein_coding	c.93dupA	p.Val32fs
4	43862959	TGG	TG	frameshift_variant	HIGH	GSAP	ENSBTAG00000018430	ENSBTAT00000068623.1	protein_coding	c.995delG	p.Gly332fs
5	91496616	TTAT	TT	frameshift_variant	HIGH	PIK3C2G	ENSBTAG00000020715	ENSBTAT00000043102.4	protein_coding	c.3547_3548delAT	p.Ile1183fs
5	33171095	CTGT	CT	frameshift_variant	HIGH	AMIGO2	ENSBTAG00000002025	ENSBTAT00000002625.5	protein_coding	c.698_699delGT	p.Cys233fs
5	95099706	AACACA	AACA	frameshift_variant	HIGH	SMCO3	ENSBTAG00000026610	ENSBTAT00000037882.5	protein_coding	c.559_560delCA	p.Gln187fs
5	74610649	A	AG	frameshift_variant	HIGH	APOL3	ENSBTAG00000040244	ENSBTAT00000044682.4	protein_coding	c.953_954insG	p.Val319fs
5	119592464	TCACA	TCA	frameshift_variant	HIGH	TUBGCP6	ENSBTAG00000000650	ENSBTAT00000000853.6	protein_coding	c.2554_2555delTG	p.Cys852fs
5	119588690	GCCCCCCC	GCCCCCCCC	frameshift_variant	HIGH	SELENOO	ENSBTAG00000000647	ENSBTAT00000079811.1	protein_coding	c.1935dupC	p.Ser646fs
6	46454584	GCTCTCTCT	GCTCTCT	frameshift_variant	HIGH	STIM2	ENSBTAG00000019353	ENSBTAT00000047170.4	protein_coding	c.2161_2162delCT	p.Leu721fs
6	108821255	CCT	C	frameshift_variant	HIGH	BOD1L1	ENSBTAG00000004316	ENSBTAT00000033704.5	protein_coding	c.806_807delAG	p.Gln269fs
6	117317861	ATT	ATTTCTT	frameshift_variant	HIGH	ENSBTAG00000049784	ENSBTAG00000049784	ENSBTAT00000080818.1	protein_coding	c.334_335insTCTT	p.Ser112fs
6	110859312	CT	C	frameshift_variant	HIGH	FAM200B	ENSBTAG00000055011	ENSBTAT00000081648.1	protein_coding	c.1653delT	p.Gly552fs
6	19939683	AT	A	frameshift_variant	HIGH	TET2	ENSBTAG00000017682	ENSBTAT00000023517.6	protein_coding	c.1483delA	p.Ile495fs
7	4879578	TAA	TA	frameshift_variant&splice_region_variant	HIGH	ENSBTAG00000053097	ENSBTAG00000053097	ENSBTAT00000069493.1	protein_coding	c.27delT	p.Lys10fs
7	71501653	CTG	C	frameshift_variant	HIGH	ADRA1B	ENSBTAG00000040253	ENSBTAT00000055443.3	protein_coding	c.508_509delTG	p.Trp170fs
7	40049408	ATGT	AT	frameshift_variant	HIGH	ZFP62	ENSBTAG00000039711	ENSBTAT00000056233.3	protein_coding	c.518_519delAC	p.Met174fs
7	42638298	TGGG	TGGGG	frameshift_variant	HIGH	ZNF692	ENSBTAG00000021115	ENSBTAT00000068077.1	protein_coding	c.25_26insC	p.Gln10fs
8	65260819	CCACA	CCA	frameshift_variant	HIGH	INVS	ENSBTAG00000009806	ENSBTAT00000068387.1	protein_coding	c.2357_2358delCA	p.Thr786fs
8	84768280	GCCC	GCCCC	frameshift_variant	HIGH	FAM120A	ENSBTAG00000008696	ENSBTAT00000030958.5	protein_coding	c.61dupC	p.Arg21fs
8	99718303	TTGTGTGTGTGTGTGTGTGTGTG	TTGTGTGTGTGTGTGTGTG,TTGTGTGTGTGTGTGTGTGTGTGTG	frameshift_variant&stop_lost	HIGH	PALM2	ENSBTAG00000014471	ENSBTAT00000082476.1	protein_coding	c.4001_4004delTGTG	p.Val1334fs
9	69817754	CATA	CA	splice_acceptor_variant&splice_region_variant&intron_variant	HIGH	ENPP1	ENSBTAG00000021830	ENSBTAT00000061365.3	protein_coding	c.2605-3_2605-2delTA
9	79692545	CTAT	CT	frameshift_variant	HIGH	VTA1	ENSBTAG00000005851	ENSBTAT00000007693.5	protein_coding	c.736_737delAT	p.Ile246fs
9	23058152	GCACA	GCA	frameshift_variant	HIGH	DOP1A	ENSBTAG00000000676	ENSBTAT00000085183.1	protein_coding	c.4848_4849delCA	p.Ile1617fs
9	87212729	AGG	AG	splice_donor_variant&intron_variant	HIGH	ENSBTAG00000036061	ENSBTAG00000036061	ENSBTAT00000057402.3	protein_coding	c.346+1delG
10	45158325	GAA	GA	frameshift_variant&splice_region_variant	HIGH	PTGDR	ENSBTAG00000006703	ENSBTAT00000008808.6	protein_coding	c.274delA	p.Ser92fs
10	12567231	ATTAC	A	splice_donor_variant&splice_region_variant&intron_variant	HIGH	DENND4A	ENSBTAG00000017095	ENSBTAT00000022733.6	protein_coding	c.4784+1_4784+4delGTAA
10	37225879	ACTCTCTCTCTCTCTC	ACTCTCTCTCTCTCTCTC	splice_acceptor_variant&intron_variant	HIGH	JMJD7	ENSBTAG00000046607	ENSBTAT00000077768.1	protein_coding	c.65-3_65-2insTC
10	62242699	GATA	GA	frameshift_variant	HIGH	SLC24A5	ENSBTAG00000004854	ENSBTAT00000006382.3	protein_coding	c.1445_1446delTA	p.Leu482fs
10	83268221	TACA	TA	splice_acceptor_variant&splice_region_variant&intron_variant	HIGH	SIPA1L1	ENSBTAG00000015805	ENSBTAT00000035650.5	protein_coding	c.4928-3_4928-2delCA
10	45390318	TCC	TC	frameshift_variant&splice_region_variant	HIGH	ZNF609	ENSBTAG00000015808	ENSBTAT00000020995.6	protein_coding	c.2217delG	p.Glu740fs
11	2790570	AGGGTGGGTGG	AGGGTGG	frameshift_variant	HIGH	CNNM3	ENSBTAG00000010846	ENSBTAT00000073188.1	protein_coding	c.1767_1770delGTGG	p.Trp590fs
11	48398219	ATAC	A	splice_donor_variant&splice_region_variant&intron_variant	HIGH	KDM3A	ENSBTAG00000013580	ENSBTAT00000018069.6	protein_coding	c.2313+1_2313+3delGTA
11	105574638	ACC	ACCC	frameshift_variant	HIGH	OLFM1	ENSBTAG00000038584	ENSBTAT00000053763.2	protein_coding	c.86dupC	p.Glu30fs
11	77427102	CAAA	CAA	frameshift_variant	HIGH	ENSBTAG00000004565	ENSBTAG00000004565	ENSBTAT00000005996.2	protein_coding	c.108delT	p.Leu37fs
11	25124534	CCTCTCT	CCTCT	frameshift_variant	HIGH	HAAO	ENSBTAG00000004674	ENSBTAT00000006132.6	protein_coding	c.298_299delAG	p.Glu101fs
12	11155667	GAA	GAAA	frameshift_variant	HIGH	ELF1	ENSBTAG00000007356	ENSBTAT00000009677.5	protein_coding	c.1655_1656insT	p.Ser553fs
12	86209327	AGG	AGGG	frameshift_variant&splice_region_variant	HIGH	TUBGCP3	ENSBTAG00000044184	ENSBTAT00000061427.3	protein_coding	c.505_506insC	p.Asn170fs
12	36232990	CGTTATGTT	CGTT	frameshift_variant	HIGH	ENSBTAG00000025383	ENSBTAG00000025383	ENSBTAT00000035646.4	protein_coding	c.191_195delAACAT	p.His65fs
12	56097723	CAAA	CAA	frameshift_variant	HIGH	ENSBTAG00000020684	ENSBTAG00000020684	ENSBTAT00000027564.4	protein_coding	c.495delA	p.Lys165fs
13	33209434	GAAAAAA	GAAAA	frameshift_variant	HIGH	EPC1	ENSBTAG00000001552	ENSBTAT00000002038.6	protein_coding	c.550_551delAA	p.Asn184fs
13	51267239	C	CT	frameshift_variant	HIGH	ENSBTAG00000050318	ENSBTAG00000050318	ENSBTAT00000075222.1	protein_coding	c.113_114insT	p.His39fs
13	40626680	ATG	A	frameshift_variant	HIGH	XRN2	ENSBTAG00000011304	ENSBTAT00000015019.5	protein_coding	c.230_231delTG	p.Met77fs
13	56608154	TCC	TC	frameshift_variant	HIGH	FAM217B	ENSBTAG00000045509	ENSBTAT00000066184.2	protein_coding	c.197delG	p.Ala72fs
13	73497990	CT	CTT	frameshift_variant	HIGH	ENSBTAG00000039446	ENSBTAG00000039446	ENSBTAT00000048359.4	protein_coding	c.6dupT	p.Pro3fs
13	46436067	TGGG	TG	frameshift_variant	HIGH	LARP4B	ENSBTAG00000013899	ENSBTAT00000086707.1	protein_coding	c.2342_2343delGG	p.Gly781fs
13	54235892	GATA	GA	frameshift_variant	HIGH	ENSBTAG00000031764	ENSBTAG00000031764	ENSBTAT00000045040.3	protein_coding	c.211_212delTA	p.Tyr71fs
13	37026796	TCCCCCCCCC	TCCCCCCCC	frameshift_variant	HIGH	RAB18	ENSBTAG00000009871	ENSBTAT00000013018.5	protein_coding	c.20delG	p.Glu10fs
13	72124636	CAAA	CAAAA	frameshift_variant	HIGH	ENSBTAG00000048526	ENSBTAG00000048526	ENSBTAT00000067640.1	protein_coding	c.836dupA	p.Val280fs
13	73038759	AACACACACACACACACACACACACACACACACAC	AACACACACACACACACACACACACACACACAC,AACACACACACACACACACACACACACACACACACAC	frameshift_variant	HIGH	ADA	ENSBTAG00000005280	ENSBTAT00000082012.1	protein_coding	c.78_79delGT	p.Cys37fs
13	59421123	TGGGG	TGGG	frameshift_variant	HIGH	ENSBTAG00000024608	ENSBTAG00000024608	ENSBTAT00000057439.2	protein_coding	c.356delG	p.Gly119fs
13	74562794	CTTT	CTTTT	splice_acceptor_variant&splice_donor_variant&intron_variant	HIGH	WFDC3	ENSBTAG00000016742	ENSBTAT00000022259.6	protein_coding	c.82-1_82insA
13	74700573	CGGG	CGG	splice_acceptor_variant&splice_donor_variant&intron_variant	HIGH	ZNF335	ENSBTAG00000010130	ENSBTAT00000061303.3	protein_coding	c.3168+1delC
14	15182350	TAGA	TA	frameshift_variant	HIGH	ZNF572	ENSBTAG00000009072	ENSBTAT00000011959.5	protein_coding	c.157_158delTC	p.Ser53fs
14	66695096	C	CTG	frameshift_variant&stop_gained	HIGH	ENSBTAG00000011290	ENSBTAG00000011290	ENSBTAT00000014999.4	protein_coding	c.468_469insTG	p.Asn157fs
14	23377259	GGGAAAGGAAAGGAAAGGAAAGG	GGGAAAGGAAAGGAAAGG	splice_donor_variant&5_prime_UTR_variant&intron_variant	HIGH	CHCHD7	ENSBTAG00000049910	ENSBTAT00000070723.1	protein_coding	c.-20_-17+1delAAAGG
14	24779836	AGGGGG	AGGGGGG	frameshift_variant	HIGH	NSMAF	ENSBTAG00000008958	ENSBTAT00000083295.1	protein_coding	c.1448_1449insC	p.Leu485fs
14	24990185	TGG	TG	frameshift_variant&splice_region_variant	HIGH	TOX	ENSBTAG00000004954	ENSBTAT00000006516.6	protein_coding	c.843delC	p.Gln282fs
15	5767181	GCCC	GCCCC	frameshift_variant	HIGH	MMP12	ENSBTAG00000053542	ENSBTAT00000081947.1	protein_coding	c.1283dupC	p.Asp430fs
15	42205281	TGGG	TGGGG	frameshift_variant	HIGH	ENSBTAG00000051340	ENSBTAG00000051340	ENSBTAT00000084886.1	protein_coding	c.764_765insC	p.Arg257fs
15	52381576	ATGTGTGTG	ATGTGTG	frameshift_variant	HIGH	FCHSD2	ENSBTAG00000019062	ENSBTAT00000025380.6	protein_coding	c.1712_1713delCA	p.Thr573fs
15	42201276	AGGGGGGG	AGGGGGGGG	frameshift_variant	HIGH	ENSBTAG00000051340	ENSBTAG00000051340	ENSBTAT00000072496.1	protein_coding	c.597_598insC	p.Leu202fs
15	54416175	C	CA	frameshift_variant	HIGH	SLCO2B1	ENSBTAG00000015596	ENSBTAT00000020716.6	protein_coding	c.1370_1371insA	p.Phe459fs
16	76054634	CTTT	CTT	splice_acceptor_variant&splice_donor_variant&intron_variant	HIGH	ASPM	ENSBTAG00000007860	ENSBTAT00000010340.6	protein_coding	c.3240+1delA
16	73512380	CTT	CTTT	frameshift_variant&splice_region_variant	HIGH	IRF6	ENSBTAG00000002849	ENSBTAT00000003694.5	protein_coding	c.487-1dupT	p.Pro163fs
16	2012175	ACTCT	ACT	frameshift_variant	HIGH	PLEKHA6	ENSBTAG00000004641	ENSBTAT00000061459.3	protein_coding	c.1650_1651delAG	p.Glu551fs
16	68951260	CAAA	CAA	frameshift_variant	HIGH	CENPF	ENSBTAG00000024449	ENSBTAT00000033913.5	protein_coding	c.7687delT	p.Phe2563fs
16	32424359	TGGGGGGGG	TGGGGGGGGG	frameshift_variant	HIGH	COX20	ENSBTAG00000033136	ENSBTAT00000047077.2	protein_coding	c.7_8insC	p.Asn6fs
16	66212898	GAAAA	GAAA	frameshift_variant	HIGH	SWT1	ENSBTAG00000004492	ENSBTAT00000061295.3	protein_coding	c.1813delA	p.Thr605fs
16	62077342	TG	T	frameshift_variant	HIGH	KIAA1614	ENSBTAG00000006260	ENSBTAT00000008215.5	protein_coding	c.2919delG	p.Glu975fs
16	37191371	AC	ACC	frameshift_variant&splice_region_variant	HIGH	F5	ENSBTAG00000017722	ENSBTAT00000023573.6	protein_coding	c.1712_1712+1insG	p.Asn571fs
17	61281645	TTGTCT	TTGTCTGTCT	frameshift_variant	HIGH	TPCN1	ENSBTAG00000011102	ENSBTAT00000071849.1	protein_coding	c.2572_2575dupGTCT	p.Phe859fs
17	40336939	ACGTAT	A,ACTCGTAT	frameshift_variant	HIGH	ETFDH	ENSBTAG00000016679	ENSBTAT00000067848.1	protein_coding	c.619_623delATACG	p.Ile207fs
17	69098165	AGGGGG	AGGGG	frameshift_variant	HIGH	MTMR3	ENSBTAG00000001030	ENSBTAT00000074360.1	protein_coding	c.3542delG	p.Gly1181fs
17	69266519	CGG	CGGG	frameshift_variant	HIGH	LIF	ENSBTAG00000007424	ENSBTAT00000073243.1	protein_coding	c.289_290insC	p.Gly98fs
17	19122717	TTGT	TT	frameshift_variant	HIGH	ENSBTAG00000055067	ENSBTAG00000055067	ENSBTAT00000075333.1	protein_coding	c.1319_1320delAC	p.Asp440fs
17	6198959	CAGAGAGAGA	CAGAGAGAGAGA	frameshift_variant	HIGH	FAM160A1	ENSBTAG00000025263	ENSBTAT00000018468.6	protein_coding	c.669_670insTC	p.Ala227fs
17	46587895	GAA	GA	frameshift_variant	HIGH	RIMBP2	ENSBTAG00000009797	ENSBTAT00000037063.4	protein_coding	c.14delA	p.Lys5fs
17	52967426	CAAAAAA	CAAAAAAA	frameshift_variant	HIGH	ZCCHC8	ENSBTAG00000006114	ENSBTAT00000008035.6	protein_coding	c.2104dupA	p.Ser702fs
17	61281770	CAAAAAAAA	CAAAAAAA	frameshift_variant	HIGH	TPCN1	ENSBTAG00000011102	ENSBTAT00000071849.1	protein_coding	c.2703delA	p.Ala902fs
18	57106141	C	CT	frameshift_variant	HIGH	ENSBTAG00000049494	ENSBTAG00000049494	ENSBTAT00000082736.1	protein_coding	c.618_619insT	p.Gly207fs
18	34231345	TACACACACACACACACACACACACAC	TACACACACACACACACACACACACACAC	frameshift_variant	HIGH	ENSBTAG00000005152	ENSBTAG00000005152	ENSBTAT00000064369.2	protein_coding	c.1067_1068insGT	p.Tyr365fs
18	61483853	TAA	TA	frameshift_variant	HIGH	ENSBTAG00000051149	ENSBTAG00000051149	ENSBTAT00000072644.1	protein_coding	c.591delT	p.Tyr198fs
18	53359049	TGG	TGGG	frameshift_variant	HIGH	SYMPK	ENSBTAG00000012101	ENSBTAT00000016048.6	protein_coding	c.2544_2545insC	p.Gly850fs
18	15016128	TAAA	TA	frameshift_variant	HIGH	ORC6	ENSBTAG00000001872	ENSBTAT00000002438.4	protein_coding	c.251_252delAA	p.Lys84fs
18	53827630	GCCC	GCC	frameshift_variant	HIGH	STRN4	ENSBTAG00000005830	ENSBTAT00000073767.1	protein_coding	c.1968delG	p.Gly657fs
18	53855900	GCCC	GCC	frameshift_variant&splice_region_variant	HIGH	FKRP	ENSBTAG00000050243	ENSBTAT00000076842.1	protein_coding	c.281delC	p.Pro94fs
19	48545861	CTT	CTTT	frameshift_variant	HIGH	PECAM1	ENSBTAG00000012066	ENSBTAT00000081191.1	protein_coding	c.2096_2097insA	p.Ser700fs
19	14962667	CG	C	frameshift_variant	HIGH	NLE1	ENSBTAG00000019094	ENSBTAT00000080209.1	protein_coding	c.1396delG	p.Val466fs
19	52226260	ATGTG	ATG	frameshift_variant	HIGH	ENSBTAG00000022489	ENSBTAG00000022489	ENSBTAT00000082004.1	protein_coding	c.300_301delCA	p.Thr101fs
19	53543224	CAGGA	CA	frameshift_variant&splice_acceptor_variant&splice_region_variant&intron_variant	HIGH	USP36	ENSBTAG00000021505	ENSBTAT00000028663.6	protein_coding	c.1266-1_1267delGGA	p.Ile423fs
19	11172194	GGAGA	GGA	frameshift_variant	HIGH	INTS2	ENSBTAG00000012070	ENSBTAT00000074245.1	protein_coding	c.52_53delGA	p.Glu18fs
19	53771695	CGCAG	CG	splice_acceptor_variant&splice_region_variant&intron_variant	HIGH	DNAH17	ENSBTAG00000000920	ENSBTAT00000084875.1	protein_coding	c.10714-3_10714-1delCAG
19	12542240	CTTTTTT	CTTTTTTT	frameshift_variant	HIGH	ENSBTAG00000034433	ENSBTAG00000034433	ENSBTAT00000023331.5	protein_coding	c.116_117insA	p.Val42fs
19	29604634	CGG	CG	frameshift_variant&splice_region_variant	HIGH	MYH3	ENSBTAG00000011803	ENSBTAT00000001120.6	protein_coding	c.4910delC	p.Ala1638fs
19	43646003	GTTTT	GTTT	frameshift_variant	HIGH	SOST	ENSBTAG00000053970	ENSBTAT00000081816.1	protein_coding	c.566delA	p.Asn190fs
19	26826212	GCCCCCCC	GCCCCCCCC	frameshift_variant	HIGH	SLC16A11	ENSBTAG00000020852	ENSBTAT00000065352.2	protein_coding	c.940_941insG	p.Leu318fs
19	17816192	AAGAGA	AAGA	frameshift_variant	HIGH	C19H17orf75	ENSBTAG00000020994	ENSBTAT00000027955.5	protein_coding	c.986_987delGA	p.Arg329fs
19	56318788	CGGCGGGCGGGCGGGCGGG	CGGCGGGCGGGCGGG	frameshift_variant	HIGH	NT5C	ENSBTAG00000011527	ENSBTAT00000015317.4	protein_coding	c.411_414delCGGG	p.Gly138fs
19	10003271	ATTTT	ATT	frameshift_variant	HIGH	TRIM37	ENSBTAG00000021677	ENSBTAT00000035518.5	protein_coding	c.1388_1389delAA	p.Asn464fs
19	51720783	GAA	GA	frameshift_variant&splice_region_variant	HIGH	RPTOR	ENSBTAG00000002883	ENSBTAT00000003739.6	protein_coding	c.2549delT	p.Leu851fs
19	26069579	ATTTTTT	ATTTTTTT	frameshift_variant	HIGH	MIS12	ENSBTAG00000020432	ENSBTAT00000027230.4	protein_coding	c.436_437insA	p.Ile148fs
20	6747846	CTTTTTT	CTTTTTTT	frameshift_variant	HIGH	NSA2	ENSBTAG00000003066	ENSBTAT00000003989.3	protein_coding	c.116_117insA	p.Met42fs
20	37255188	TTTTGTTT	TTTT	frameshift_variant	HIGH	NIPBL	ENSBTAG00000000579	ENSBTAT00000020129.5	protein_coding	c.2461_2464delAAAC	p.Gln822fs
20	8179391	CTAT	CT	frameshift_variant	HIGH	ENSBTAG00000049168	ENSBTAG00000049168	ENSBTAT00000082083.1	protein_coding	c.187_188delAT	p.Ile63fs
21	55487520	AGTG	AG	frameshift_variant	HIGH	WDR76	ENSBTAG00000017215	ENSBTAT00000022879.5	protein_coding	c.1857_1858delTG	p.Ser619fs
21	22287695	GGAGAG	GGAG	frameshift_variant	HIGH	ZSCAN2	ENSBTAG00000001385	ENSBTAT00000001821.5	protein_coding	c.1447_1448delAG	p.Ser483fs
22	16375116	GTTT	GTTTT	frameshift_variant	HIGH	ENSBTAG00000052626	ENSBTAG00000052626	ENSBTAT00000086521.1	protein_coding	c.1524_1525insA	p.Pro510fs
22	54246579	TCC	TCCC	frameshift_variant	HIGH	ZDHHC3	ENSBTAG00000011484	ENSBTAT00000078706.1	protein_coding	c.1053dupC	p.Val352fs
22	52530537	TGGGGGGG	TGGGGG	splice_donor_variant&splice_region_variant&intron_variant	HIGH	ENSBTAG00000048957	ENSBTAG00000048957	ENSBTAT00000070628.1	pseudogene	n.1848+2_1848+3delCC
23	3691914	ATTTTT	ATTT	frameshift_variant	HIGH	DST	ENSBTAG00000021237	ENSBTAT00000061451.3	protein_coding	c.5123_5124delTT	p.Phe1708fs
24	439536	CTTTTTTTTTTTTT	CTTTTTTTTTTTT	frameshift_variant&stop_lost&splice_region_variant	HIGH	ADNP2	ENSBTAG00000005916	ENSBTAT00000007769.6	protein_coding	c.3455delA	p.Ter1152fs
24	45984594	AATAT	AAT	frameshift_variant	HIGH	C24H18orf25	ENSBTAG00000032964	ENSBTAT00000081040.1	protein_coding	c.973_974delAT	p.Ile325fs
24	21166032	TGG	TG	frameshift_variant	HIGH	ENSBTAG00000052576	ENSBTAG00000052576	ENSBTAT00000079796.1	protein_coding	c.266delG	p.Gly89fs
24	45588543	AG	A	frameshift_variant	HIGH	EPG5	ENSBTAG00000012067	ENSBTAT00000082297.1	protein_coding	c.7816delC	p.Leu2606fs
25	2693155	TAAAAAAAAA	TAAAAAAAAAA	frameshift_variant	HIGH	MEFV	ENSBTAG00000019123	ENSBTAT00000073733.1	protein_coding	c.1198_1199insT	p.Ter403fs
25	37790698	AGGGG	AGGGGG	frameshift_variant	HIGH	TECPR1	ENSBTAG00000051678	ENSBTAT00000072906.1	protein_coding	c.2788dupG	p.Ala930fs
25	26577981	TGA	T	frameshift_variant	HIGH	ZNF48	ENSBTAG00000031806	ENSBTAT00000028273.6	protein_coding	c.1027_1028delGA	p.Asp343fs
25	33734904	CGGG	CGG	frameshift_variant	HIGH	FZD9	ENSBTAG00000051341	ENSBTAT00000079469.1	protein_coding	c.481delC	p.Gly162fs
25	38251137	CAAA	CAAAA	frameshift_variant	HIGH	ENSBTAG00000053719	ENSBTAG00000053719	ENSBTAT00000066734.1	protein_coding	c.260_261insT	p.Leu88fs
25	27403516	AG	A	splice_acceptor_variant&intron_variant	HIGH	ENSBTAG00000054461	ENSBTAG00000054461	ENSBTAT00000069265.1	protein_coding	c.703-1delG
26	14872707	CTT	CT	frameshift_variant&splice_region_variant	HIGH	FFAR4	ENSBTAG00000000437	ENSBTAT00000000560.5	protein_coding	c.482delT	p.Leu161fs
26	37608773	AG	A	frameshift_variant&splice_region_variant	HIGH	PDZD8	ENSBTAG00000011401	ENSBTAT00000015152.5	protein_coding	c.2232delC	p.Leu745fs
26	24461802	CTTT	CT	frameshift_variant	HIGH	STN1	ENSBTAG00000015019	ENSBTAT00000079260.1	protein_coding	c.441_442delAA	p.Lys148fs
26	22781201	C	CT	frameshift_variant	HIGH	LDB1	ENSBTAG00000005780	ENSBTAT00000073299.1	protein_coding	c.926_927insA	p.Ala311fs
27	34208795	CTAGT	CT	frameshift_variant&splice_acceptor_variant&splice_region_variant&intron_variant	HIGH	ADAM9	ENSBTAG00000017455	ENSBTAT00000079444.1	protein_coding	c.1396-2_1396delAGT	p.Phe466fs
28	43130675	ACC	ACCC	splice_acceptor_variant&intron_variant	HIGH	WDFY4	ENSBTAG00000023028	ENSBTAT00000031292.5	protein_coding	c.4848-3_4848-2insC
28	44124057	CTTT	CTT	frameshift_variant	HIGH	FAM21A	ENSBTAG00000018915	ENSBTAT00000025173.5	protein_coding	c.551delT	p.Leu184fs
28	12882805	ACTCTC	ACTC	frameshift_variant	HIGH	ZNF37A	ENSBTAG00000051862	ENSBTAT00000068133.1	protein_coding	c.1100_1101delTC	p.Leu367fs
28	4868071	GTTTT	GTT	frameshift_variant	HIGH	DISC1	ENSBTAG00000050839	ENSBTAT00000070721.1	protein_coding	c.2580_2581delTT	p.Ter863fs
29	41088598	ATT	AT	frameshift_variant	HIGH	TAF6L	ENSBTAG00000009484	ENSBTAT00000080980.1	protein_coding	c.32delT	p.Phe11fs
29	44388906	CTTT	CTTTT	frameshift_variant	HIGH	RIN1	ENSBTAG00000017681	ENSBTAT00000023514.4	protein_coding	c.69_70insA	p.Glu25fs
29	39854190	GCGGCC	GC	frameshift_variant	HIGH	TKFC	ENSBTAG00000018201	ENSBTAT00000085239.1	protein_coding	c.1824_1827delGGCC	p.Ala609fs
29	44415038	ACT	A	frameshift_variant	HIGH	SLC29A2	ENSBTAG00000012024	ENSBTAT00000015948.6	protein_coding	c.423_424delAG	p.Val142fs
29	43601629	A	AC	splice_acceptor_variant&intron_variant	HIGH	FRMD8	ENSBTAG00000002039	ENSBTAT00000033253.4	protein_coding	c.1274-3_1274-2insC
29	46355943	AG	AGG	frameshift_variant	HIGH	MRGPRF	ENSBTAG00000015185	ENSBTAT00000015595.5	protein_coding	c.425_426insC	p.Ser143fs
29	45352768	AG	A	frameshift_variant	HIGH	TMEM134	ENSBTAG00000004786	ENSBTAT00000029973.5	protein_coding	c.760delC	p.Leu254fs
29	9860347	CGAGAG	CGAG	frameshift_variant	HIGH	SYTL2	ENSBTAG00000000460	ENSBTAT00000071933.1	protein_coding	c.2529_2530delAG	p.Arg843fs
29	45291323	CTTT	CTTTT	frameshift_variant	HIGH	RAD9A	ENSBTAG00000012141	ENSBTAT00000016108.6	protein_coding	c.991dupT	p.Ser331fs
NKLS02000591.1	231030	AGGGG	AGGGGG	splice_donor_variant&intron_variant	HIGH	ENSBTAG00000055058	ENSBTAG00000055058	ENSBTAT00000080615.1	protein_coding	c.1088+1_1088+2insG
NKLS02000782.1	4062	CGG	CGGG	frameshift_variant	HIGH	ENSBTAG00000054081	ENSBTAG00000054081	ENSBTAT00000077255.1	protein_coding	c.1177_1178insC	p.Glu394fs
NKLS02000782.1	7793	TCCCC	TCCCCC	frameshift_variant	HIGH	ENSBTAG00000054081	ENSBTAG00000054081	ENSBTAT00000077255.1	protein_coding	c.963_964insG	p.Glu323fs
NKLS02001928.1	494938	TGCGCCGC	TGC	frameshift_variant	HIGH	ENSBTAG00000052869	ENSBTAG00000052869	ENSBTAT00000068546.1	protein_coding	c.281_285delGCCGC	p.Arg94fs
X	135677885	TA	T	frameshift_variant	HIGH	PUDP	ENSBTAG00000000207	ENSBTAT00000071814.1	protein_coding	c.614delA	p.Tyr205fs
X	78535869	GACA	GA	frameshift_variant	HIGH	NHSL2	ENSBTAG00000045565	ENSBTAT00000072216.1	protein_coding	c.2430_2431delTG	p.Val811fs
X	71428785	GAAA	GA	frameshift_variant	HIGH	HMGN5	ENSBTAG00000001877	ENSBTAT00000082587.1	protein_coding	c.203_204delAA	p.Lys68fs
X	86675178	CTTT	CT	frameshift_variant	HIGH	ENSBTAG00000051063	ENSBTAG00000051063	ENSBTAT00000079109.1	protein_coding	c.212_213delAA	p.Arg72fs
X	86675284	ATTTT	ATT	frameshift_variant	HIGH	ENSBTAG00000051063	ENSBTAG00000051063	ENSBTAT00000079109.1	protein_coding	c.105_106delAA	p.Lys36fs
X	102374740	CAAAAAA	CAAAAAAA	frameshift_variant	HIGH	ENSBTAG00000049862	ENSBTAG00000049862	ENSBTAT00000073512.1	protein_coding	c.31dupA	p.Met11fs
